# Supplementary material for: Limited evidence for blood eQTLs in human sexual dimorphism
Source: Genome Med. 2022 Aug 11;14:89. doi: 10.1186/s13073-022-01088-w (PMC9373355; doi:10.1186/s13073-022-01088-w)
Supplement: Supplementary file 2 — Additional file 2: Table S1. Sex-specific eQTLs. Table S2. Summary statistics for eQTLs in binding sites for estrogen receptor genes. Table S3. Gene level summary statistics. Table S4. Wilcoxon test P-values for mean sex differences in cellular composition. Table S5. Wilcoxon test P-values for mean sex differences in principal components. Table S6. Levene test P-values for mean sex differences before and after correcting for principal components. Table S7. BIOS results for the sex-biased eQTLs found in Yao et al [PMID: 24242183]. Table S8. BIOS results for the sex-biased eQTLs found in Kukurba et al [PMID: 27197214]. Table S9. Replication analyses results - SHIP-Trend cohort. Table S10. PheWAS for top sex-specific eQTLs. Table S11. Independent SNPs associated with WHR. Table S12. Independent SNPs associated with testosterone. Table S13. Sex-stratified TWMR results for testosterone. Table S14. Sex-stratified TWMR results for WHR. Table S15. Sex specific causal genes for WHR and testosterone. [file 13073_2022_1088_MOESM2_ESM.xlsx]

## Sheet: Table S1
Table S1. Sex-specific eQTLs
SNP	Gene	Gene name	Allele	zscore_f	zscore_m	Z_diff	pval	FDR	pvalue_f	pvalue_m
rs7126061	ENSG00000166387	PPFIBP2	G	-35.2856	-24.0889	5.39821	6.73078e-08	0.0049004	9.697e-273	3.25981e-128
rs4758197	ENSG00000166387	PPFIBP2	G	-33.9003	-23.4896	4.92714	8.34427e-07	0.0290205	6.57186e-252	5.20997e-122
rs11127318	ENSG00000130508	PXDN	C	32.2921	22.2311	-4.80127	1.57661e-06	0.0350461	9.05925e-229	1.72254e-109
rs12467139	ENSG00000130508	PXDN	G	31.7683	21.4746	-5.01946	5.18162e-07	0.0217723	1.78032e-221	2.69026e-102
rs4853830	ENSG00000130508	PXDN	G	31.2665	20.889	-5.12451	2.98305e-07	0.0147296	1.33639e-214	6.74162e-97
rs11695002	ENSG00000130508	PXDN	G	31.2013	20.529	-5.35052	8.77042e-08	0.00563636	1.02625e-213	1.1859e-93
rs8045674	ENSG00000103479	RBL2	A	-30.1923	-20.4406	4.7471	2.06358e-06	0.0410827	2.98033e-200	7.28382e-93
rs11859538	ENSG00000103479	RBL2	G	-30.2917	-20.4074	4.83784	1.3126e-06	0.0313098	1.47002e-201	1.4373e-92
rs4783811	ENSG00000103479	RBL2	G	-30.2787	-20.4074	4.82923	1.37065e-06	0.0320301	2.18019e-201	1.4373e-92
rs10748	ENSG00000103479	RBL2	C	-30.281	-20.4069	4.83116	1.35743e-06	0.0319776	2.02721e-201	1.44911e-92
rs1131220	ENSG00000103479	RBL2	A	-30.281	-20.4069	4.83116	1.35743e-06	0.0319776	2.02721e-201	1.44911e-92
rs1072911	ENSG00000103479	RBL2	C	-30.2318	-20.4069	4.79846	1.59891e-06	0.035111	9.05178e-201	1.44911e-92
rs1362429	ENSG00000103479	RBL2	C	-30.2849	-20.3879	4.84792	1.24762e-06	0.0313098	1.80662e-201	2.13705e-92
rs9927720	ENSG00000103479	RBL2	A	-30.2784	-20.3879	4.84356	1.27532e-06	0.0313098	2.20678e-201	2.13705e-92
rs9921587	ENSG00000103479	RBL2	G	-30.2718	-20.3879	4.83921	1.30357e-06	0.0313098	2.67917e-201	2.13705e-92
rs9927982	ENSG00000103479	RBL2	T	-30.3054	-20.3772	4.86953	1.11866e-06	0.0312607	9.73133e-202	2.66469e-92
rs17801498	ENSG00000103479	RBL2	G	-30.2147	-20.3749	4.81109	1.50108e-06	0.0338997	1.51397e-200	2.78716e-92
rs1074182	ENSG00000103479	RBL2	G	-30.2701	-20.3746	4.84811	1.24645e-06	0.0313098	2.82938e-201	2.81002e-92
rs1072910	ENSG00000103479	RBL2	G	-30.284	-20.3723	4.85896	1.18003e-06	0.0312607	1.86224e-201	2.93915e-92
rs4784312	ENSG00000103479	RBL2	C	-30.2359	-20.3723	4.82703	1.38582e-06	0.0320862	7.97124e-201	2.93915e-92
rs7204496	ENSG00000103479	RBL2	A	-30.2805	-20.3723	4.85665	1.19387e-06	0.0312607	2.06442e-201	2.93915e-92
rs9921627	ENSG00000103479	RBL2	A	-30.2899	-20.3723	4.8629	1.15678e-06	0.0312607	1.55249e-201	2.93915e-92
rs7204758	ENSG00000103479	RBL2	A	-30.3168	-20.3723	4.8807	1.05708e-06	0.0308962	6.88558e-202	2.93915e-92
rs16952246	ENSG00000103479	RBL2	T	-30.2995	-20.3723	4.86927	1.12011e-06	0.0312607	1.16034e-201	2.93915e-92
rs9929873	ENSG00000103479	RBL2	T	-30.315	-20.3694	4.88174	1.05156e-06	0.0308962	7.22818e-202	3.11209e-92
rs13332406	ENSG00000103479	RBL2	A	-30.2867	-20.3694	4.86298	1.15632e-06	0.0312607	1.71067e-201	3.11209e-92
rs7194730	ENSG00000103479	RBL2	T	-30.2867	-20.3694	4.86298	1.15632e-06	0.0312607	1.71067e-201	3.11209e-92
rs9941254	ENSG00000103479	RBL2	T	-30.3102	-20.3694	4.87855	1.06866e-06	0.0308962	8.36158e-202	3.11209e-92
rs7202621	ENSG00000103479	RBL2	A	-30.3275	-20.3694	4.89002	1.00828e-06	0.0308962	4.96093e-202	3.11209e-92
rs6499617	ENSG00000103479	RBL2	G	-30.2595	-20.3655	4.84783	1.2482e-06	0.0313098	3.90092e-201	3.37691e-92
rs56126229	ENSG00000103479	RBL2	A	-30.2618	-20.3593	4.85397	1.21014e-06	0.0312607	3.62737e-201	3.83248e-92
rs9938788	ENSG00000103479	RBL2	C	-30.2615	-20.3564	4.85595	1.1981e-06	0.0312607	3.6716e-201	4.05784e-92
rs16952252	ENSG00000103479	RBL2	A	-30.3168	-20.3535	4.8948	9.84053e-07	0.0308962	6.88558e-202	4.31399e-92
rs62048518	ENSG00000103479	RBL2	T	-30.2988	-20.3486	4.88658	1.02604e-06	0.0308962	1.18165e-201	4.77724e-92
rs62048526	ENSG00000103479	RBL2	A	-30.1847	-20.3434	4.81465	1.47457e-06	0.033474	3.74986e-200	5.29011e-92
rs1978337	ENSG00000103479	RBL2	A	-30.2578	-20.3377	4.8675	1.13021e-06	0.0312607	4.09465e-201	5.95421e-92
rs17800577	ENSG00000103479	RBL2	A	-30.3119	-20.337	4.90387	9.39655e-07	0.0302464	7.96531e-202	6.02749e-92
rs13330182	ENSG00000103479	RBL2	A	-30.2947	-20.337	4.89244	9.95943e-07	0.0308962	1.34218e-201	6.02749e-92
rs17193176	ENSG00000103479	RBL2	C	-30.1891	-20.3296	4.82788	1.37993e-06	0.0320752	3.28298e-200	7.00876e-92
rs3803657	ENSG00000103479	RBL2	C	-30.2159	-20.3267	4.84788	1.24786e-06	0.0313098	1.46e-200	7.45058e-92
rs8056349	ENSG00000103479	RBL2	C	-30.2595	-20.3158	4.88496	1.03449e-06	0.0308962	3.90092e-201	9.284e-92
rs8046307	ENSG00000103479	RBL2	T	-30.188	-20.2957	4.8526	1.21851e-06	0.0312607	3.38371e-200	1.40057e-91
rs8049033	ENSG00000103479	RBL2	C	-30.1783	-20.2952	4.84655	1.25624e-06	0.0313098	4.54984e-200	1.41777e-91
rs8043918	ENSG00000103479	RBL2	T	-30.1956	-20.2952	4.85799	1.18584e-06	0.0312607	2.70556e-200	1.41777e-91
rs8062535	ENSG00000103479	RBL2	A	-30.1956	-20.2952	4.85799	1.18584e-06	0.0312607	2.70556e-200	1.41777e-91
rs4146344	ENSG00000103479	RBL2	T	-30.299	-20.2937	4.92771	8.31991e-07	0.0290205	1.18165e-201	1.45873e-91
rs8044091	ENSG00000103479	RBL2	C	-30.1651	-20.2935	4.83898	1.30509e-06	0.0313098	6.77878e-200	1.46467e-91
rs11864278	ENSG00000103479	RBL2	T	-30.2788	-20.2932	4.91475	8.8897e-07	0.0295128	2.16701e-201	1.47664e-91
rs8061073	ENSG00000103479	RBL2	T	-30.2631	-20.2846	4.90479	9.35262e-07	0.0302464	3.49787e-201	1.75174e-91
rs8056370	ENSG00000103479	RBL2	T	-30.1563	-20.2822	4.84159	1.28804e-06	0.0313098	8.84191e-200	1.83934e-91
rs3929	ENSG00000103479	RBL2	C	-30.1314	-20.2781	4.8282	1.37775e-06	0.0320752	1.88013e-199	2.00329e-91
rs1861353	ENSG00000103479	RBL2	G	-30.1643	-20.2661	4.85899	1.17985e-06	0.0312607	6.94454e-200	2.55652e-91
rs8061398	ENSG00000103479	RBL2	T	-30.2317	-20.2521	4.91419	8.91483e-07	0.0295128	9.05178e-201	3.39724e-91
rs4783813	ENSG00000103479	RBL2	G	-30.1369	-20.2501	4.85281	1.21722e-06	0.0312607	1.58789e-199	3.53801e-91
rs13337544	ENSG00000103479	RBL2	C	-30.127	-20.2342	4.85809	1.18521e-06	0.0312607	2.14697e-199	4.89505e-91
rs9932007	ENSG00000103479	RBL2	A	-30.2964	-20.2242	4.97801	6.424e-07	0.0249531	1.27861e-201	5.9955e-91
rs13332071	ENSG00000103479	RBL2	A	-30.2102	-20.2137	4.92867	8.27931e-07	0.0290205	1.73996e-200	7.40236e-91
rs8055279	ENSG00000103479	RBL2	C	-30.0985	-20.1892	4.8729	1.09971e-06	0.0312607	5.05411e-199	1.21821e-90
rs7199401	ENSG00000103479	RBL2	T	-29.8446	-20.1113	4.74114	2.12521e-06	0.0420225	1.03159e-195	5.8645e-90
rs2908797	ENSG00000103479	RBL2	T	-29.9781	-20.0675	4.88396	1.03978e-06	0.0308962	1.88826e-197	1.41683e-89
rs1861351	ENSG00000103479	RBL2	C	-29.9449	-20.0119	4.90352	9.41326e-07	0.0302464	5.11146e-197	4.32926e-89
rs4281707	ENSG00000103479	RBL2	A	-29.7574	-19.9727	4.80837	1.52164e-06	0.0342753	1.39109e-194	9.4977e-89
rs9931702	ENSG00000103479	RBL2	T	-29.6226	-19.9629	4.72632	2.28629e-06	0.0445027	7.64646e-193	1.15562e-88
rs9302648	ENSG00000103479	RBL2	T	-29.5755	-19.9284	4.72083	2.34882e-06	0.0456182	3.07837e-192	2.29904e-88
rs7203132	ENSG00000103479	RBL2	A	-30.1079	-19.923	5.07819	3.81053e-07	0.0177145	3.8073e-199	2.5609e-88
rs8055642	ENSG00000103479	RBL2	G	-29.6054	-19.8872	4.75029	2.03127e-06	0.0407178	1.26576e-192	5.23182e-88
rs1861350	ENSG00000103479	RBL2	C	-29.4206	-19.7986	4.71509	2.416e-06	0.0467154	2.9942e-190	3.0487e-87
rs1344491	ENSG00000103479	RBL2	C	-29.3759	-19.775	4.70312	2.56211e-06	0.048785	1.11268e-189	4.86893e-87
rs1861349	ENSG00000103479	RBL2	G	-28.8477	-19.3007	4.70732	2.50994e-06	0.0481061	5.39928e-183	5.28841e-83
rs8056923	ENSG00000103479	RBL2	G	-28.8873	-19.2814	4.74806	2.05379e-06	0.0409811	1.719e-183	7.6668e-83
rs4645032	ENSG00000130508	PXDN	T	29.3351	19.149	-5.14434	2.68462e-07	0.0137169	3.71262e-189	9.90428e-82
rs2024449	ENSG00000103479	RBL2	C	-28.9287	-18.704	5.2075	1.91402e-07	0.0105874	5.18672e-184	4.57548e-78
rs6989313	ENSG00000253967	RP11-333A23.4	C	-6.2711	-12.4842	-5.17679	2.25739e-07	0.0122541	3.58737e-10	9.08254e-36
rs6928160	ENSG00000164414	SLC35A1	C	6.42199	12.3894	5.00575	5.56446e-07	0.0226197	1.34495e-10	2.98267e-35
rs7757636	ENSG00000164414	SLC35A1	G	6.41388	12.3737	4.99936	5.75202e-07	0.0232739	1.4175e-10	3.63172e-35
rs7773906	ENSG00000164414	SLC35A1	A	6.50334	12.3407	4.9153	8.86447e-07	0.0295128	7.85246e-11	5.47464e-35
rs6454632	ENSG00000164414	SLC35A1	C	6.49918	12.3398	4.91736	8.77204e-07	0.0294869	8.07483e-11	5.54306e-35
rs9450733	ENSG00000164414	SLC35A1	T	6.48271	12.3381	4.92704	8.34835e-07	0.0290205	9.00358e-11	5.6543e-35
rs4707374	ENSG00000164414	SLC35A1	C	6.46597	12.3255	4.92877	8.27509e-07	0.0290205	1.00631e-10	6.61146e-35
rs1051131	ENSG00000164414	SLC35A1	G	6.50519	12.3102	4.89124	1.00204e-06	0.0308962	7.75901e-11	8.00232e-35
rs7762864	ENSG00000164414	SLC35A1	G	6.50519	12.304	4.88662	1.0258e-06	0.0308962	7.75901e-11	8.61974e-35
rs6906769	ENSG00000164414	SLC35A1	C	6.50519	12.304	4.88662	1.0258e-06	0.0308962	7.75901e-11	8.61974e-35
rs9450739	ENSG00000164414	SLC35A1	A	6.29543	12.3013	5.02379	5.06626e-07	0.0213904	3.06213e-10	8.92384e-35
rs9450738	ENSG00000164414	SLC35A1	G	6.25757	12.3013	5.04891	4.44333e-07	0.0199148	3.90947e-10	8.92384e-35
rs6916732	ENSG00000164414	SLC35A1	T	6.37565	12.2942	4.96525	6.86129e-07	0.0258476	1.8201e-10	9.75566e-35
rs3757368	ENSG00000164414	SLC35A1	C	6.50519	12.2915	4.87724	1.07579e-06	0.0308962	7.75901e-11	1.00746e-34
rs2325064	ENSG00000164414	SLC35A1	A	6.50519	12.2915	4.87724	1.07579e-06	0.0308962	7.75901e-11	1.00746e-34
rs1051148	ENSG00000164414	SLC35A1	G	6.50519	12.2915	4.87724	1.07579e-06	0.0308962	7.75901e-11	1.00746e-34
rs4334949	ENSG00000164414	SLC35A1	A	6.24832	12.2877	5.04491	4.53731e-07	0.0199985	4.14679e-10	1.05595e-34
rs985764	ENSG00000164414	SLC35A1	A	6.50519	12.2789	4.86786	1.12811e-06	0.0312607	7.75901e-11	1.17732e-34
rs4464759	ENSG00000164414	SLC35A1	C	6.28055	12.2726	5.01225	5.37979e-07	0.0223372	3.37269e-10	1.27105e-34
rs6940150	ENSG00000164414	SLC35A1	C	6.28055	12.2708	5.01088	5.41829e-07	0.0223372	3.37269e-10	1.29963e-34
rs3934838	ENSG00000164414	SLC35A1	C	6.24783	12.2708	5.03259	4.83898e-07	0.0207312	4.15742e-10	1.29963e-34
rs9450744	ENSG00000164414	SLC35A1	C	6.31198	12.2708	4.99001	6.03757e-07	0.0239851	2.75452e-10	1.29963e-34
rs7742965	ENSG00000164414	SLC35A1	C	6.28055	12.2708	5.01088	5.41829e-07	0.0223372	3.37269e-10	1.29963e-34
rs9450732	ENSG00000164414	SLC35A1	A	6.48271	12.2577	4.86691	1.13359e-06	0.0312607	9.00358e-11	1.52963e-34
rs2300909	ENSG00000164414	SLC35A1	A	6.50519	12.2574	4.85176	1.2237e-06	0.0312715	7.75901e-11	1.5372e-34
rs2300906	ENSG00000164414	SLC35A1	A	6.51512	12.2574	4.84517	1.26503e-06	0.0313098	7.25929e-11	1.5372e-34
rs13193380	ENSG00000164414	SLC35A1	T	6.26566	12.254	5.00817	5.49501e-07	0.0225471	3.70916e-10	1.60305e-34
rs4587143	ENSG00000164414	SLC35A1	G	6.26566	12.2522	5.00686	5.53263e-07	0.0225954	3.70916e-10	1.635e-34
rs4707377	ENSG00000164414	SLC35A1	T	6.28055	12.2512	4.99623	5.84613e-07	0.0235457	3.37269e-10	1.65528e-34
rs9444512	ENSG00000164414	SLC35A1	A	6.50519	12.2442	4.8419	1.28604e-06	0.0313098	7.75901e-11	1.80448e-34
rs34684538	ENSG00000253967	RP11-333A23.4	C	-6.16003	-12.2441	-5.07091	3.95926e-07	0.0183085	7.27449e-10	1.80448e-34
rs9450723	ENSG00000164414	SLC35A1	G	6.51512	12.2363	4.8294	1.36947e-06	0.0320301	7.25929e-11	1.9914e-34
rs4707379	ENSG00000164414	SLC35A1	G	6.28237	12.2239	4.9746	6.53818e-07	0.0252843	3.33386e-10	2.31982e-34
rs4707376	ENSG00000164414	SLC35A1	G	6.29543	12.2169	4.9607	7.02411e-07	0.0259027	3.06213e-10	2.52843e-34
rs9444522	ENSG00000164414	SLC35A1	A	6.26503	12.2168	4.98081	6.33181e-07	0.0247048	3.72347e-10	2.52843e-34
rs6923230	ENSG00000164414	SLC35A1	C	6.43245	12.2138	4.86741	1.13072e-06	0.0312607	1.25439e-10	2.6299e-34
rs80149539	ENSG00000164414	SLC35A1	G	6.42275	12.2078	4.86939	1.11944e-06	0.0312607	1.3379e-10	2.82423e-34
rs7750207	ENSG00000164414	SLC35A1	C	6.2768	12.2066	4.96534	6.85803e-07	0.0258476	3.45168e-10	2.86618e-34
rs9450752	ENSG00000164414	SLC35A1	G	6.27123	12.204	4.96709	6.79667e-07	0.0258268	3.57816e-10	2.95922e-34
rs6918909	ENSG00000164414	SLC35A1	C	6.58351	12.2029	4.75899	1.94566e-06	0.0392719	4.59191e-11	3.00316e-34
rs4498321	ENSG00000164414	SLC35A1	C	6.37523	12.2021	4.89662	9.74977e-07	0.0308962	1.82486e-10	3.03282e-34
rs7755167	ENSG00000164414	SLC35A1	C	6.37523	12.2021	4.89662	9.74977e-07	0.0308962	1.82486e-10	3.03282e-34
rs9450762	ENSG00000164414	SLC35A1	G	6.3369	12.2021	4.92206	8.56362e-07	0.0292432	2.34282e-10	3.03282e-34
rs7772561	ENSG00000164414	SLC35A1	G	6.3369	12.2021	4.92206	8.56362e-07	0.0292432	2.34282e-10	3.03282e-34
rs4707383	ENSG00000164414	SLC35A1	A	6.3369	12.2021	4.92206	8.56362e-07	0.0292432	2.34282e-10	3.03282e-34
rs6454638	ENSG00000164414	SLC35A1	G	6.3413	12.1986	4.91656	8.80788e-07	0.0294939	2.27687e-10	3.16214e-34
rs4853830	ENSG00000186487	MYT1L	G	23.3532	12.1961	-6.37537	1.82526e-10	5.90832e-05	1.28475e-120	3.26471e-34
rs4707373	ENSG00000164414	SLC35A1	G	6.58555	12.195	4.75178	2.01635e-06	0.0405115	4.53052e-11	3.30504e-34
rs10755484	ENSG00000164414	SLC35A1	T	6.58351	12.195	4.75313	2.00292e-06	0.0403344	4.59191e-11	3.30504e-34
rs9444519	ENSG00000164414	SLC35A1	C	6.26566	12.195	4.96404	6.90435e-07	0.025887	3.70916e-10	3.31316e-34
rs9444526	ENSG00000164414	SLC35A1	G	6.32569	12.1899	4.92042	8.63606e-07	0.0292432	2.51924e-10	3.52285e-34
rs6454636	ENSG00000164414	SLC35A1	C	6.31639	12.1899	4.92659	8.36765e-07	0.0290205	2.67727e-10	3.52285e-34
rs9444525	ENSG00000164414	SLC35A1	C	6.31639	12.1899	4.92659	8.36765e-07	0.0290205	2.67727e-10	3.52285e-34
rs4707382	ENSG00000164414	SLC35A1	C	6.26155	12.1881	4.96164	6.99022e-07	0.025887	3.81047e-10	3.60152e-34
rs2754260	ENSG00000164414	SLC35A1	C	6.37945	12.188	4.88332	1.04313e-06	0.0308962	1.77551e-10	3.60152e-34
rs2754262	ENSG00000164414	SLC35A1	G	6.4334	12.1853	4.84546	1.2632e-06	0.0313098	1.24617e-10	3.72738e-34
rs2284908	ENSG00000164414	SLC35A1	G	6.31715	12.1842	4.92177	8.57654e-07	0.0292432	2.66345e-10	3.78265e-34
rs2380651	ENSG00000253967	RP11-333A23.4	T	-6.0463	-12.1748	-5.09455	3.49577e-07	0.0166045	1.48302e-09	4.22394e-34
rs2787924	ENSG00000164414	SLC35A1	C	6.42817	12.1739	4.8404	1.29575e-06	0.0313098	1.29124e-10	4.28652e-34
rs2754245	ENSG00000164414	SLC35A1	A	6.43511	12.1668	4.83051	1.36185e-06	0.0319955	1.23311e-10	4.67035e-34
rs7746465	ENSG00000164414	SLC35A1	G	6.37523	12.1663	4.86985	1.11681e-06	0.0312607	1.82486e-10	4.7048e-34
rs6930600	ENSG00000164414	SLC35A1	A	6.37523	12.1643	4.86834	1.12541e-06	0.0312607	1.82486e-10	4.82146e-34
rs7757794	ENSG00000164414	SLC35A1	G	6.31573	12.163	4.90686	9.25449e-07	0.0300678	2.68767e-10	4.90482e-34
rs4706294	ENSG00000164414	SLC35A1	C	6.29052	12.1597	4.92112	8.60494e-07	0.0292432	3.16241e-10	5.10078e-34
rs6908386	ENSG00000164414	SLC35A1	C	6.37912	12.1594	4.86214	1.16124e-06	0.0312607	1.78015e-10	5.11329e-34
rs9450712	ENSG00000164414	SLC35A1	T	6.30605	12.1581	4.90961	9.12565e-07	0.0299217	2.85969e-10	5.20166e-34
rs11695002	ENSG00000186487	MYT1L	G	23.4452	12.1575	-6.46536	1.0106e-10	3.8402e-05	1.48665e-121	5.24e-34
rs4587138	ENSG00000164414	SLC35A1	C	6.37912	12.1568	4.86018	1.17277e-06	0.0312607	1.78015e-10	5.27862e-34
rs7754350	ENSG00000164414	SLC35A1	G	6.52325	12.1555	4.76352	1.90244e-06	0.0388285	6.87312e-11	5.36983e-34
rs2754248	ENSG00000164414	SLC35A1	C	6.46547	12.1524	4.7996	1.58985e-06	0.0350461	1.00898e-10	5.57059e-34
rs7752494	ENSG00000164414	SLC35A1	A	6.37355	12.1477	4.8571	1.1912e-06	0.0312607	1.84642e-10	5.90744e-34
rs10091374	ENSG00000253967	RP11-333A23.4	A	-5.98981	-12.1324	-5.10026	3.39181e-07	0.0162878	2.10099e-09	7.11336e-34
rs7761814	ENSG00000164414	SLC35A1	A	6.28875	12.1244	4.89594	9.7838e-07	0.0308962	3.19929e-10	7.84325e-34
rs2268994	ENSG00000164414	SLC35A1	T	6.30048	12.1231	4.88716	1.02303e-06	0.0308962	2.96496e-10	7.97842e-34
rs2307379	ENSG00000164414	SLC35A1	G	6.37275	12.113	4.83167	1.35393e-06	0.0319776	1.85608e-10	9.0136e-34
rs2268993	ENSG00000164414	SLC35A1	A	6.29673	12.1114	4.88088	1.05616e-06	0.0308962	3.03853e-10	9.21363e-34
rs2207146	ENSG00000164414	SLC35A1	G	6.25245	12.1098	4.90908	9.15037e-07	0.0299217	4.03675e-10	9.39512e-34
rs6454641	ENSG00000164414	SLC35A1	C	6.40837	12.0965	4.79565	1.62146e-06	0.0354281	1.47055e-10	1.10345e-33
rs6454640	ENSG00000164414	SLC35A1	C	6.40837	12.0965	4.79565	1.62146e-06	0.0354281	1.47055e-10	1.10345e-33
rs6931069	ENSG00000164414	SLC35A1	T	6.40837	12.0937	4.79359	1.6382e-06	0.0356522	1.47055e-10	1.14172e-33
rs9450755	ENSG00000164414	SLC35A1	C	6.31632	12.0833	4.8469	1.25408e-06	0.0313098	2.67727e-10	1.29577e-33
rs6923355	ENSG00000164414	SLC35A1	T	6.48206	12.0799	4.73103	2.2338e-06	0.0436756	9.03947e-11	1.35048e-33
rs13194003	ENSG00000164414	SLC35A1	C	6.3974	12.0788	4.78968	1.67047e-06	0.0357813	1.57838e-10	1.37033e-33
rs3918467	ENSG00000164414	SLC35A1	G	6.24046	12.0767	4.89227	9.96814e-07	0.0308962	4.35896e-10	1.40406e-33
rs2273129	ENSG00000164414	SLC35A1	C	6.24781	12.0694	4.88191	1.05065e-06	0.0308962	4.15742e-10	1.5362e-33
rs9444504	ENSG00000164414	SLC35A1	G	6.22942	12.0681	4.89321	9.92067e-07	0.0308962	4.67628e-10	1.55877e-33
rs7838853	ENSG00000253967	RP11-333A23.4	C	-6.17219	-12.0147	-4.89875	9.64498e-07	0.0308774	6.74315e-10	2.97088e-33
rs6472531	ENSG00000253967	RP11-333A23.4	C	-6.15741	-12.0147	-4.90855	9.17527e-07	0.0299217	7.39489e-10	2.97088e-33
rs2787893	ENSG00000164414	SLC35A1	G	6.43258	11.9905	4.70027	2.59816e-06	0.0491503	1.25439e-10	3.98974e-33
rs28507404	ENSG00000253967	RP11-333A23.4	A	-6.10827	-11.9861	-4.91974	8.66608e-07	0.0292432	1.00761e-09	4.19722e-33
rs12678139	ENSG00000253967	RP11-333A23.4	A	-5.95128	-11.844	-4.91013	9.10176e-07	0.0299217	2.66184e-09	2.31159e-32
rs6472533	ENSG00000253967	RP11-333A23.4	T	-5.85057	-11.8188	-4.95813	7.11743e-07	0.0260272	4.90392e-09	3.11369e-32
rs12467139	ENSG00000186487	MYT1L	G	23.0261	11.6627	-6.55734	5.47744e-11	2.17599e-05	2.55953e-117	1.97905e-31
rs7577301	ENSG00000186487	MYT1L	T	21.8809	11.2868	-6.07848	1.21329e-09	0.000235643	3.95839e-106	1.52488e-29
rs11127318	ENSG00000186487	MYT1L	C	22.2622	11.2102	-6.38884	1.67151e-10	5.61871e-05	8.59256e-110	3.63371e-29
rs7577940	ENSG00000186487	MYT1L	T	21.8746	11.2082	-6.13309	8.61863e-10	0.00018372	4.53471e-106	3.71675e-29
rs6723926	ENSG00000186487	MYT1L	A	21.5294	11.1579	-5.94163	2.82206e-09	0.000425245	8.29531e-103	6.55947e-29
rs7560311	ENSG00000186487	MYT1L	G	22.1052	11.0685	-6.39061	1.65228e-10	5.61871e-05	2.82935e-108	1.7856e-28
rs4645032	ENSG00000186487	MYT1L	T	21.8076	11.0653	-6.19551	5.80977e-10	0.000145103	1.97379e-105	1.8505e-28
rs2288180	ENSG00000186487	MYT1L	C	21.8823	11.0645	-6.24576	4.21731e-10	0.000115183	3.83872e-106	1.86708e-28
rs7608632	ENSG00000186487	MYT1L	T	21.6114	11.0639	-6.0664	1.3081e-09	0.000248534	1.40329e-103	1.87962e-28
rs4853756	ENSG00000186487	MYT1L	C	21.6777	11.0048	-6.1546	7.52654e-10	0.000164451	3.3384e-104	3.62319e-28
rs11127317	ENSG00000186487	MYT1L	G	21.8311	10.9593	-6.29042	3.16602e-10	8.92595e-05	1.17815e-105	6.00276e-28
rs11684279	ENSG00000186487	MYT1L	A	21.8556	10.9577	-6.30783	2.82969e-10	8.24366e-05	6.90636e-106	6.10982e-28
rs4853831	ENSG00000186487	MYT1L	T	21.8196	10.8514	-6.35962	2.02251e-10	6.31298e-05	1.51838e-105	1.96394e-27
rs9294381	ENSG00000164414	SLC35A1	A	-4.96055	-10.8062	-4.79129	1.65713e-06	0.0356724	7.02758e-07	3.21723e-27
rs9294380	ENSG00000164414	SLC35A1	G	-4.95851	-10.8062	-4.79264	1.64597e-06	0.0356724	7.1003e-07	3.21723e-27
rs6914299	ENSG00000164414	SLC35A1	T	-5.0246	-10.7973	-4.74213	2.11485e-06	0.0419123	5.03957e-07	3.54088e-27
rs6912958	ENSG00000164414	SLC35A1	G	-4.93506	-10.7953	-4.8001	1.58583e-06	0.0350461	8.00687e-07	3.61883e-27
rs9294379	ENSG00000164414	SLC35A1	C	-4.9789	-10.7946	-4.77047	1.83794e-06	0.0380277	6.39136e-07	3.64255e-27
rs2207144	ENSG00000164414	SLC35A1	A	-4.99135	-10.7946	-4.76221	1.91481e-06	0.0388285	5.99432e-07	3.64255e-27
rs9450688	ENSG00000164414	SLC35A1	T	-5.01866	-10.7945	-4.74397	2.0957e-06	0.0416274	5.19952e-07	3.65049e-27
rs13214153	ENSG00000164414	SLC35A1	G	-4.98238	-10.7475	-4.7329	2.21332e-06	0.0434697	6.28004e-07	6.08236e-27
rs4535042	ENSG00000138363	ATIC	G	4.82423	10.5559	4.70095	2.58956e-06	0.0490938	1.40566e-06	4.77554e-26
rs12995105	ENSG00000138363	ATIC	G	4.67451	10.5242	4.77019	1.84051e-06	0.0380277	2.94814e-06	6.69687e-26
rs12990040	ENSG00000138363	ATIC	T	4.44266	10.4222	4.84776	1.24864e-06	0.0313098	8.88783e-06	1.96771e-25
rs13029082	ENSG00000138363	ATIC	G	4.2643	10.2862	4.8644	1.14803e-06	0.0312607	2.0062e-05	8.14917e-25
rs13002052	ENSG00000138363	ATIC	G	4.27634	10.2836	4.85449	1.20699e-06	0.0312607	1.9011e-05	8.35474e-25
rs35671754	ENSG00000138363	ATIC	T	4.26121	10.2583	4.84561	1.26225e-06	0.0313098	2.03332e-05	1.08714e-24
rs33996776	ENSG00000138363	ATIC	A	4.08364	9.95129	4.73379	2.20365e-06	0.0433772	4.43433e-05	2.4916e-23
rs17338616	ENSG00000186487	MYT1L	T	-18.2764	-9.91471	4.71271	2.44442e-06	0.0471607	1.27574e-74	3.58975e-23
rs6711837	ENSG00000186487	MYT1L	T	18.6494	9.8861	-4.98166	6.30426e-07	0.0247048	1.28181e-77	4.78777e-23
rs11682113	ENSG00000186487	MYT1L	T	-18.2322	-9.82722	4.74885	2.04581e-06	0.0409154	2.86558e-74	8.58054e-23
rs4853832	ENSG00000186487	MYT1L	T	-19.0981	-9.80134	5.34284	9.15015e-08	0.00579496	2.62346e-81	1.11036e-22
rs7588942	ENSG00000186487	MYT1L	T	20.238	9.70235	-6.17339	6.68427e-10	0.000153735	4.55033e-91	2.95067e-22
rs1983841	ENSG00000164414	SLC35A1	T	-3.40562	-9.60753	-4.92661	8.36688e-07	0.0290205	0.0006597	7.42597e-22
rs2270363	ENSG00000089486	CDIP1	A	-2.0113	-9.56527	-5.82035	5.87233e-09	0.000703055	0.0442832	1.11768e-21
rs2025486	ENSG00000164414	SLC35A1	T	-3.41116	-9.56085	-4.88802	1.01853e-06	0.0308962	0.0006468	1.16624e-21
rs9342104	ENSG00000164414	SLC35A1	A	-3.40768	-9.55212	-4.8838	1.04062e-06	0.0308962	0.0006549	1.26971e-21
rs6743176	ENSG00000186487	MYT1L	G	18.9114	9.54319	-5.41206	6.2305e-08	0.0046749	9.18847e-80	1.38759e-21
rs9444471	ENSG00000164414	SLC35A1	C	-3.3867	-9.53683	-4.88629	1.02755e-06	0.0308962	0.0007071	1.47024e-21
rs7751610	ENSG00000164414	SLC35A1	C	-3.42602	-9.52827	-4.85379	1.21124e-06	0.0312607	0.0006121	1.59726e-21
rs6926846	ENSG00000164414	SLC35A1	C	-3.41495	-9.51672	-4.85249	1.21921e-06	0.0312607	0.0006378	1.78594e-21
rs9444470	ENSG00000164414	SLC35A1	T	-3.41495	-9.5139	-4.85038	1.23224e-06	0.0313098	0.0006378	1.83469e-21
rs6710314	ENSG00000186487	MYT1L	C	18.892	9.50703	-5.42624	5.75523e-08	0.00453149	1.32721e-79	1.9624e-21
rs3747584	ENSG00000089486	CDIP1	T	-2.09488	-9.49994	-5.71501	1.09701e-08	0.00124515	0.036171	2.0989e-21
rs6760792	ENSG00000186487	MYT1L	A	18.8564	9.49718	-5.40993	6.30487e-08	0.0046749	2.61341e-79	2.16024e-21
rs6713503	ENSG00000186487	MYT1L	C	18.8504	9.49413	-5.40822	6.36528e-08	0.0046749	2.92734e-79	2.22335e-21
rs3828759	ENSG00000164414	SLC35A1	T	-3.41074	-9.49295	-4.83751	1.31475e-06	0.0313098	0.0006477	2.24479e-21
rs4706287	ENSG00000164414	SLC35A1	A	-3.39322	-9.48257	-4.84138	1.28943e-06	0.0313098	0.0006903	2.48025e-21
rs7206782	ENSG00000089486	CDIP1	A	-1.90557	-9.47483	-5.82287	5.78462e-09	0.000702173	0.0567021	2.66761e-21
rs6454578	ENSG00000164414	SLC35A1	T	-3.40538	-9.47383	-4.82676	1.38774e-06	0.0320862	0.0006607	2.69328e-21
rs9934267	ENSG00000089486	CDIP1	G	-2.05009	-9.46162	-5.71708	1.08372e-08	0.00124515	0.0403449	3.02687e-21
rs10203567	ENSG00000186487	MYT1L	T	20.0394	9.45784	-6.2245	4.8309e-10	0.000127943	2.4976e-89	3.1449e-21
rs11639998	ENSG00000089486	CDIP1	T	-1.93808	-9.44824	-5.7814	7.40805e-09	0.000863265	0.0525988	3.44049e-21
rs4786498	ENSG00000089486	CDIP1	A	-2.11802	-9.44255	-5.65774	1.53383e-08	0.00165498	0.0341581	3.63642e-21
rs6713889	ENSG00000186487	MYT1L	C	18.7169	9.42853	-5.36871	7.93031e-08	0.00533149	3.6121e-78	4.16392e-21
rs3747585	ENSG00000089486	CDIP1	C	-2.0534	-9.42741	-5.6893	1.27564e-08	0.00141125	0.0400338	4.19579e-21
rs4786497	ENSG00000089486	CDIP1	A	-2.09313	-9.41643	-5.65471	1.56107e-08	0.00166383	0.0363313	4.65931e-21
rs4786494	ENSG00000089486	CDIP1	G	-2.00588	-9.41591	-5.71222	1.11509e-08	0.00124944	0.0448562	4.686e-21
rs6500610	ENSG00000089486	CDIP1	A	-2.08101	-9.41589	-5.66235	1.49315e-08	0.00163123	0.0374156	4.686e-21
rs1898737	ENSG00000089486	CDIP1	G	-2.11354	-9.37972	-5.61371	1.98036e-08	0.00197649	0.0345494	6.6098e-21
rs4785966	ENSG00000089486	CDIP1	A	-2.09633	-9.36071	-5.6109	2.01272e-08	0.00197649	0.0360467	7.91352e-21
rs72631612	ENSG00000140090	SLC24A4	T	-2.1758	-9.30252	-5.51464	3.49495e-08	0.00308537	0.0295702	1.37052e-20
rs7200280	ENSG00000089486	CDIP1	T	-1.73507	-9.2963	-5.80696	6.36155e-09	0.000751334	0.0827054	1.45281e-20
rs6575255	ENSG00000140090	SLC24A4	A	-3.01363	-9.29455	-4.95264	7.32138e-07	0.0265508	0.00258	1.47761e-20
rs9938228	ENSG00000089486	CDIP1	T	-2.03602	-9.29101	-5.59879	2.15855e-08	0.00207312	0.0417303	1.52558e-20
rs61977294	ENSG00000140090	SLC24A4	A	-2.82143	-9.25632	-5.0516	4.38127e-07	0.0197378	0.0047785	2.11441e-20
rs7194923	ENSG00000089486	CDIP1	C	-2.07477	-9.22713	-5.52556	3.28443e-08	0.00295931	0.0380051	2.77799e-20
rs11884460	ENSG00000186487	MYT1L	G	18.6688	9.2195	-5.49314	3.94839e-08	0.00328649	8.91594e-78	2.98767e-20
rs61977292	ENSG00000140090	SLC24A4	A	-2.77346	-9.19794	-5.03976	4.66108e-07	0.0202671	0.005544	3.64674e-20
rs981086	ENSG00000164414	SLC35A1	A	3.04256	9.09685	4.78556	1.70513e-06	0.0359422	0.0023454	9.30325e-20
rs981087	ENSG00000164414	SLC35A1	T	3.04283	9.09685	4.78538	1.70668e-06	0.0359422	0.0023423	9.30325e-20
rs9929311	ENSG00000089486	CDIP1	T	-1.96076	-9.09494	-5.50207	3.7535e-08	0.00321617	0.0499024	9.45865e-20
rs61977291	ENSG00000140090	SLC24A4	G	-2.75872	-9.06902	-4.95311	7.30357e-07	0.0265508	0.0058014	1.19894e-19
rs72695178	ENSG00000140090	SLC24A4	A	-2.83955	-9.04923	-4.88466	1.03605e-06	0.0308962	0.004517	1.43756e-19
rs1079363	ENSG00000140090	SLC24A4	C	-2.72264	-9.04867	-4.96183	6.98309e-07	0.025887	0.0064731	1.44548e-19
rs57250157	ENSG00000140090	SLC24A4	G	-2.6944	-9.0209	-4.9598	7.05673e-07	0.0259136	0.0070473	1.8638e-19
rs4424915	ENSG00000089486	CDIP1	G	-2.01172	-9.01539	-5.40875	6.34667e-08	0.0046749	0.044241	1.96153e-19
rs4786500	ENSG00000089486	CDIP1	C	-1.80871	-8.9725	-5.51139	3.56012e-08	0.00311147	0.0704821	2.89596e-19
rs1861652	ENSG00000089486	CDIP1	C	-1.99379	-8.96457	-5.38263	7.3404e-08	0.00513229	0.0461739	3.11409e-19
rs4785969	ENSG00000089486	CDIP1	T	-2.07019	-8.92328	-5.30104	1.15144e-07	0.00696042	0.0384336	4.52188e-19
rs6500601	ENSG00000089486	CDIP1	G	-1.61112	-8.90076	-5.58886	2.28566e-08	0.00217133	0.107136	5.54456e-19
rs13006826	ENSG00000186487	MYT1L	T	18.9541	8.90031	-5.92132	3.19375e-09	0.000459833	4.09259e-80	5.57461e-19
rs4785968	ENSG00000089486	CDIP1	T	-2.01124	-8.89709	-5.32057	1.0344e-07	0.00641166	0.0442832	5.72732e-19
rs8053770	ENSG00000089486	CDIP1	T	-1.99764	-8.89679	-5.32937	9.85522e-08	0.00615234	0.0457383	5.74799e-19
rs8051695	ENSG00000089486	CDIP1	T	-2.01677	-8.88575	-5.30842	1.10581e-07	0.00675845	0.0437164	6.34624e-19
rs11685947	ENSG00000186487	MYT1L	T	18.8907	8.88527	-5.89045	3.85135e-09	0.00051724	1.36288e-79	6.38059e-19
rs1139652	ENSG00000089486	CDIP1	T	-1.53386	-8.87329	-5.61959	1.91413e-08	0.00197539	0.12503	7.09459e-19
rs6500614	ENSG00000089486	CDIP1	A	-1.901	-8.87039	-5.37376	7.71107e-08	0.00528016	0.057302	7.28836e-19
rs8046295	ENSG00000089486	CDIP1	T	-1.86607	-8.86706	-5.39445	6.87337e-08	0.0049004	0.0620134	7.50081e-19
rs7702	ENSG00000089486	CDIP1	G	-1.91805	-8.83041	-5.33254	9.68474e-08	0.0060894	0.0550857	1.04116e-18
rs1477123	ENSG00000089486	CDIP1	T	-1.62496	-8.81622	-5.52068	3.37683e-08	0.00301152	0.104163	1.18199e-18
rs6548056	ENSG00000186487	MYT1L	C	18.7896	8.80526	-5.88319	4.02438e-09	0.00051724	9.22161e-79	1.30619e-18
rs4786517	ENSG00000089486	CDIP1	A	-1.91582	-8.80342	-5.31383	1.07345e-07	0.00660689	0.0553651	1.32496e-18
rs8043603	ENSG00000089486	CDIP1	C	-1.9784	-8.79045	-5.26166	1.42763e-07	0.00848789	0.0478836	1.48763e-18
rs61977272	ENSG00000140090	SLC24A4	G	-1.74155	-8.77666	-5.40947	6.32117e-08	0.0046749	0.0815785	1.68192e-18
rs4786513	ENSG00000089486	CDIP1	T	-1.80186	-8.77505	-5.36639	8.03284e-08	0.0053592	0.0715454	1.706e-18
rs6716647	ENSG00000186487	MYT1L	A	17.5718	8.77365	-5.09866	3.42068e-07	0.0163366	4.05112e-69	1.73043e-18
rs10158949	ENSG00000162408	NOL9	T	-17.0865	-8.77131	4.77832	1.7677e-06	0.0367842	1.8675e-65	1.76458e-18
rs11809957	ENSG00000162408	NOL9	A	-17.0048	-8.75426	4.73687	2.17044e-06	0.04282	7.54052e-65	2.05192e-18
rs4786514	ENSG00000089486	CDIP1	A	-1.79133	-8.74615	-5.35176	8.71008e-08	0.00563636	0.0732291	2.20658e-18
rs7665	ENSG00000089486	CDIP1	A	-1.51299	-8.74581	-5.53808	3.05811e-08	0.0027841	0.13028	2.21049e-18
rs58303004	ENSG00000140090	SLC24A4	G	-1.75148	-8.73517	-5.37184	7.79355e-08	0.00528016	0.0798426	2.43225e-18
rs1362626	ENSG00000089486	CDIP1	C	-1.97488	-8.72709	-5.21753	1.81321e-07	0.0102239	0.0482681	2.61055e-18
rs11811007	ENSG00000162408	NOL9	C	-17.0048	-8.72275	4.76043	1.93177e-06	0.0390818	7.54052e-65	2.71405e-18
rs6759577	ENSG00000186487	MYT1L	G	17.5385	8.71225	-5.12245	3.01585e-07	0.0148029	7.29526e-69	2.98033e-18
rs934929	ENSG00000089486	CDIP1	G	-1.35509	-8.70793	-5.61861	1.92501e-08	0.00197539	0.175354	3.09283e-18
rs60852225	ENSG00000140090	SLC24A4	G	-1.75148	-8.70488	-5.34918	8.83522e-08	0.00563636	0.0798426	3.17575e-18
rs67134452	ENSG00000140090	SLC24A4	A	-1.75148	-8.70488	-5.34918	8.83522e-08	0.00563636	0.0798426	3.17575e-18
rs61977271	ENSG00000140090	SLC24A4	C	-1.74601	-8.70488	-5.35282	8.65959e-08	0.00563636	0.0807762	3.17575e-18
rs2059413	ENSG00000186487	MYT1L	C	17.5559	8.70332	-5.1407	2.73716e-07	0.0138279	5.3705e-69	3.22655e-18
rs6716138	ENSG00000186487	MYT1L	A	17.5673	8.6989	-5.15155	2.58341e-07	0.01336	4.39327e-69	3.35412e-18
rs34757678	ENSG00000162408	NOL9	G	-17.0048	-8.69139	4.7839	1.71927e-06	0.0361204	7.54052e-65	3.58e-18
rs2182870	ENSG00000162408	NOL9	T	-17.0865	-8.69139	4.83811	1.31083e-06	0.0313098	1.8675e-65	3.58e-18
rs2304631	ENSG00000089486	CDIP1	A	-1.50434	-8.68841	-5.50502	3.69131e-08	0.00319419	0.132478	3.66933e-18
rs12046229	ENSG00000162408	NOL9	T	-17.0361	-8.68829	4.80701	1.53206e-06	0.0343731	4.4257e-65	3.6758e-18
rs860891	ENSG00000089486	CDIP1	T	-1.52545	-8.68828	-5.48677	4.09349e-08	0.00337512	0.127109	3.6758e-18
rs4359690	ENSG00000186487	MYT1L	T	17.5671	8.67935	-5.16604	2.39107e-07	0.0125889	4.40878e-69	3.98562e-18
rs12028881	ENSG00000162408	NOL9	G	-17.0908	-8.67302	4.85473	1.20549e-06	0.0312607	1.73178e-65	4.20143e-18
rs41278016	ENSG00000162408	NOL9	G	-17.0924	-8.67022	4.85785	1.18668e-06	0.0312607	1.6907e-65	4.30605e-18
rs12027598	ENSG00000162408	NOL9	T	-17.0536	-8.66224	4.84044	1.29554e-06	0.0313098	3.28653e-65	4.61934e-18
rs7191664	ENSG00000089486	CDIP1	T	-1.47815	-8.66152	-5.49815	3.83804e-08	0.00324676	0.139354	4.65188e-18
rs12401795	ENSG00000162408	NOL9	G	-17.0721	-8.65952	4.85241	1.2197e-06	0.0312607	2.39021e-65	4.73423e-18
rs4243831	ENSG00000162408	NOL9	C	-16.943	-8.65934	4.76683	1.87147e-06	0.0385761	2.16782e-64	4.74254e-18
rs4243830	ENSG00000162408	NOL9	C	-16.9778	-8.65934	4.78995	1.66824e-06	0.0357813	1.19897e-64	4.74254e-18
rs4243832	ENSG00000162408	NOL9	C	-16.9719	-8.65677	4.78799	1.68463e-06	0.0358731	1.32347e-64	4.85193e-18
rs709632	ENSG00000089486	CDIP1	G	-1.31281	-8.65658	-5.60822	2.0442e-08	0.0019851	0.189183	4.86045e-18
rs11643057	ENSG00000089486	CDIP1	C	-2.08477	-8.64293	-5.08071	3.7602e-07	0.017574	0.0370875	5.47559e-18
rs12046884	ENSG00000162408	NOL9	A	-17.0657	-8.63937	4.8632	1.15505e-06	0.0312607	2.66711e-65	5.6509e-18
rs11122082	ENSG00000162408	NOL9	T	-17.0865	-8.63544	4.87995	1.06111e-06	0.0308962	1.8675e-65	5.84196e-18
rs6726081	ENSG00000186487	MYT1L	C	17.5787	8.62486	-5.21455	1.84264e-07	0.0102575	3.5934e-69	6.42048e-18
rs12047931	ENSG00000162408	NOL9	T	-17.0696	-8.62465	4.8768	1.07821e-06	0.0308962	2.49906e-65	6.42048e-18
rs12137494	ENSG00000162408	NOL9	G	-17.0126	-8.62093	4.84179	1.28672e-06	0.0313098	6.60064e-65	6.63719e-18
rs58415361	ENSG00000162408	NOL9	G	-17.1875	-8.614	4.96304	6.93995e-07	0.025887	3.28867e-66	7.04317e-18
rs4786504	ENSG00000089486	CDIP1	T	-1.54038	-8.61358	-5.42211	5.88984e-08	0.0045554	0.123463	7.08014e-18
rs841231	ENSG00000089486	CDIP1	T	-1.45667	-8.61298	-5.47609	4.34825e-08	0.00355167	0.145172	7.11731e-18
rs8129	ENSG00000089486	CDIP1	T	-1.3152	-8.60511	-5.56409	2.63525e-08	0.00247651	0.188376	7.61838e-18
rs61977284	ENSG00000140090	SLC24A4	T	-2.20844	-8.59974	-4.96727	6.79022e-07	0.0258268	0.0272025	7.98551e-18
rs7552107	ENSG00000162408	NOL9	A	-17.1093	-8.59259	4.92715	8.34394e-07	0.0290205	1.26294e-65	8.50231e-18
rs6755424	ENSG00000186487	MYT1L	G	17.5882	8.58621	-5.24973	1.52323e-07	0.00887514	3.04434e-69	8.98931e-18
rs10864626	ENSG00000162408	NOL9	A	-16.9072	-8.57417	4.80677	1.53385e-06	0.0343731	3.98183e-64	9.97779e-18
rs111497797	ENSG00000162408	NOL9	T	-16.9229	-8.5718	4.81902	1.44264e-06	0.0330062	3.04516e-64	1.0188e-17
rs41278014	ENSG00000162408	NOL9	C	-17.0356	-8.57154	4.894	9.88062e-07	0.0308962	4.45606e-65	1.02057e-17
rs4786503	ENSG00000089486	CDIP1	T	-1.42887	-8.56639	-5.45969	4.76977e-08	0.0038599	0.153004	1.06771e-17
rs3848372	ENSG00000089486	CDIP1	C	-1.19775	-8.56626	-5.61693	1.94379e-08	0.00197539	0.230995	1.06771e-17
rs3908553	ENSG00000162408	NOL9	A	-16.9097	-8.56337	4.81657	1.46048e-06	0.0333272	3.80999e-64	1.09587e-17
rs150033822	ENSG00000250312	ZNF718	G	-0.296198	-8.54511	-6.19548	5.81089e-10	0.000145103	0.767077	1.28314e-17
rs73213573	ENSG00000250312	ZNF718	A	-0.329724	-8.52842	-6.16075	7.24026e-10	0.000162252	0.741551	1.48129e-17
rs4786508	ENSG00000089486	CDIP1	G	-1.38414	-8.51902	-5.45394	4.92649e-08	0.00395015	0.166297	1.60659e-17
rs143562055	ENSG00000140090	SLC24A4	T	-1.8689	-8.48285	-5.10939	3.23208e-07	0.0156065	0.0616228	2.19461e-17
rs4786512	ENSG00000089486	CDIP1	A	-1.38823	-8.46255	-5.40899	6.33824e-08	0.0046749	0.165015	2.61481e-17
rs11674354	ENSG00000186487	MYT1L	T	17.875	8.44638	-5.54471	2.94436e-08	0.00273211	1.84675e-71	3.00938e-17
rs863501	ENSG00000089486	CDIP1	C	-1.40278	-8.43003	-5.37899	7.49028e-08	0.00519553	0.160676	3.45075e-17
rs4785967	ENSG00000089486	CDIP1	G	-2.18067	-8.42995	-4.85869	1.18165e-06	0.0312607	0.0291982	3.45665e-17
rs62039231	ENSG00000089486	CDIP1	A	-2.24139	-8.4256	-4.81514	1.47098e-06	0.033474	0.0250002	3.58906e-17
rs6740028	ENSG00000186487	MYT1L	G	17.2787	8.41931	-5.16922	2.35072e-07	0.0125273	6.8183e-67	3.79064e-17
rs7195361	ENSG00000089486	CDIP1	A	-1.97982	-8.41401	-4.98431	6.21847e-07	0.024592	0.0477035	3.95585e-17
rs10431636	ENSG00000140090	SLC24A4	A	-2.17637	-8.38104	-4.82496	1.40032e-06	0.0322068	0.0295254	5.23908e-17
rs28607509	ENSG00000140090	SLC24A4	G	-2.09311	-8.37252	-4.87383	1.09453e-06	0.0312607	0.0363313	5.63607e-17
rs4786501	ENSG00000089486	CDIP1	A	-2.13995	-8.36804	-4.8394	1.3023e-06	0.0313098	0.0323548	5.8505e-17
rs77152455	ENSG00000250312	ZNF718	G	0.110537	-8.36697	-6.33216	2.41759e-10	7.28594e-05	0.912092	5.91037e-17
rs61977279	ENSG00000140090	SLC24A4	A	-2.06749	-8.3644	-4.88477	1.03552e-06	0.0308962	0.0386777	6.04216e-17
rs6692747	ENSG00000162408	NOL9	T	-16.921	-8.35238	4.98189	6.29673e-07	0.0247048	3.13968e-64	6.68897e-17
rs67253851	ENSG00000140090	SLC24A4	A	-2.21633	-8.33618	-4.76489	1.88959e-06	0.0388285	0.0266641	7.67161e-17
rs61975656	ENSG00000140090	SLC24A4	A	-2.21633	-8.33342	-4.76282	1.9091e-06	0.0388285	0.0266641	7.84206e-17
rs12036631	ENSG00000162408	NOL9	C	-16.8287	-8.32771	4.9391	7.84859e-07	0.0282284	1.50114e-63	8.23585e-17
rs61975657	ENSG00000140090	SLC24A4	C	-2.1804	-8.3237	-4.77939	1.75828e-06	0.0366756	0.029213	8.51873e-17
rs12029979	ENSG00000162408	NOL9	T	-16.8298	-8.32241	4.94609	7.57207e-07	0.0273465	1.476e-63	8.60545e-17
rs112429605	ENSG00000162408	NOL9	G	-16.6452	-8.32158	4.81109	1.50108e-06	0.0338997	3.26775e-62	8.67838e-17
rs12714326	ENSG00000186487	MYT1L	A	17.4661	8.31331	-5.37284	7.75071e-08	0.00528016	2.60103e-68	9.31553e-17
rs61975659	ENSG00000140090	SLC24A4	T	-2.08432	-8.26512	-4.79933	1.59195e-06	0.0350461	0.0371238	1.39461e-16
rs72695156	ENSG00000140090	SLC24A4	A	-2.18379	-8.26352	-4.73213	2.2218e-06	0.0435384	0.0289769	1.41344e-16
rs61977265	ENSG00000140090	SLC24A4	A	-2.08912	-8.25121	-4.78574	1.70354e-06	0.0359422	0.0366897	1.5655e-16
rs61977273	ENSG00000140090	SLC24A4	T	-2.08298	-8.24005	-4.78147	1.74015e-06	0.0363842	0.0372512	1.71923e-16
rs72631610	ENSG00000140090	SLC24A4	T	-2.08298	-8.24005	-4.78147	1.74015e-06	0.0363842	0.0372512	1.71923e-16
rs61977270	ENSG00000140090	SLC24A4	G	-2.052	-8.24005	-4.80203	1.57062e-06	0.0350176	0.0401697	1.71923e-16
rs61977269	ENSG00000140090	SLC24A4	T	-2.05382	-8.24005	-4.80083	1.58011e-06	0.0350461	0.0399757	1.71923e-16
rs61977277	ENSG00000140090	SLC24A4	T	-2.01351	-8.23481	-4.82366	1.40949e-06	0.0323324	0.0440515	1.79558e-16
rs61977276	ENSG00000140090	SLC24A4	T	-2.00112	-8.23481	-4.83188	1.35251e-06	0.0319776	0.0453708	1.79558e-16
rs4786502	ENSG00000089486	CDIP1	T	-2.18708	-8.23079	-4.70546	2.53291e-06	0.0483344	0.0287279	1.85967e-16
rs61977267	ENSG00000140090	SLC24A4	A	-2.03461	-8.21307	-4.79339	1.63988e-06	0.0356522	0.041871	2.1537e-16
rs61977266	ENSG00000140090	SLC24A4	G	-2.03643	-8.21307	-4.79218	1.64978e-06	0.0356724	0.0416901	2.1537e-16
rs61977268	ENSG00000140090	SLC24A4	A	-2.03461	-8.20258	-4.78554	1.70527e-06	0.0359422	0.041871	2.35243e-16
rs1641866	ENSG00000089486	CDIP1	A	-1.07517	-8.03157	-5.29436	1.19432e-07	0.00714943	0.282285	9.62096e-16
rs2270365	ENSG00000089486	CDIP1	G	-1.7386	-8.0083	-4.84064	1.29423e-06	0.0313098	0.0821051	1.1621e-15
rs12917680	ENSG00000089486	CDIP1	A	-1.15291	-7.76373	-5.04602	4.51106e-07	0.0199985	0.24891	8.24218e-15
rs6757793	ENSG00000186487	MYT1L	T	16.3053	7.72423	-5.04313	4.57972e-07	0.0200129	9.06418e-60	1.12558e-14
rs12443748	ENSG00000089486	CDIP1	C	-1.5538	-7.67723	-4.71165	2.45718e-06	0.0473024	0.120184	1.6235e-14
rs114458534	ENSG00000250312	ZNF718	C	-0.709384	-7.65754	-5.25733	1.4616e-07	0.00863117	0.478076	1.8944e-14
rs6712822	ENSG00000186487	MYT1L	T	16.1735	7.64941	-5.01165	5.39661e-07	0.0223372	7.76899e-59	2.01919e-14
rs12988270	ENSG00000186487	MYT1L	T	-15.6717	-7.58097	4.7298	2.24744e-06	0.0438441	2.35806e-55	3.42902e-14
rs4853833	ENSG00000186487	MYT1L	A	17.3272	7.55104	-5.85089	4.88957e-09	0.000610484	2.93263e-67	4.31929e-14
rs11690006	ENSG00000186487	MYT1L	C	15.9956	7.45799	-5.03673	4.73556e-07	0.0203881	1.37572e-57	8.79791e-14
rs6751762	ENSG00000186487	MYT1L	G	15.8826	7.44531	-4.97127	6.65155e-07	0.0256094	8.36384e-57	9.67977e-14
rs11894542	ENSG00000186487	MYT1L	T	15.9968	7.42009	-5.06592	4.06441e-07	0.0186959	1.34514e-57	1.1712e-13
rs10187229	ENSG00000186487	MYT1L	A	16.0039	7.39201	-5.09162	3.55009e-07	0.0167714	1.20209e-57	1.44637e-13
rs4359691	ENSG00000186487	MYT1L	T	16.0466	7.39003	-5.12146	3.03178e-07	0.0148029	6.03825e-58	1.46829e-13
rs6711486	ENSG00000186487	MYT1L	T	16.1871	7.38807	-5.21617	1.82661e-07	0.0102335	6.22925e-59	1.49054e-13
rs28716466	ENSG00000250312	ZNF718	C	-0.260032	-6.99887	-5.06284	4.13057e-07	0.0189007	0.794709	2.57796e-12
rs6751291	ENSG00000186487	MYT1L	G	15.7294	6.78737	-5.36174	8.24259e-08	0.00545747	9.54089e-56	1.14331e-11
rs1659496	ENSG00000089486	CDIP1	C	0.325554	-6.62565	-5.17296	2.30413e-07	0.0123544	0.744878	3.45373e-11
rs1659498	ENSG00000089486	CDIP1	C	0.340778	-6.6064	-5.16799	2.36628e-07	0.0125338	0.733405	3.93247e-11
rs35421439	ENSG00000089486	CDIP1	T	0.333873	-6.60035	-5.15888	2.48437e-07	0.0130017	0.73853	4.1005e-11
rs28606635	ENSG00000089486	CDIP1	T	0.346413	-6.56916	-5.14387	2.6914e-07	0.0137169	0.729042	5.05863e-11
rs1684583	ENSG00000089486	CDIP1	A	0.311348	-6.56336	-5.11626	3.11649e-07	0.0151319	0.755649	5.25945e-11
rs34115721	ENSG00000089486	CDIP1	G	0.215505	-6.53449	-5.03105	4.8779e-07	0.020796	0.829456	6.37798e-11
rs859219	ENSG00000089486	CDIP1	A	0.55397	-6.53279	-5.25441	1.48497e-07	0.00871031	0.579716	6.45513e-11
rs12684934	ENSG00000095261	PSMD5	C	14.4911	6.49247	-4.76246	1.91248e-06	0.0388285	1.38117e-47	8.44796e-11
rs1659505	ENSG00000089486	CDIP1	A	0.404018	-6.38485	-5.04423	4.55353e-07	0.0199985	0.686213	1.71397e-10
rs11076840	ENSG00000089486	CDIP1	A	0.55809	-6.3806	-5.1433	2.6995e-07	0.0137169	0.576844	1.76165e-10
rs7201687	ENSG00000089486	CDIP1	A	0.596993	-6.19329	-5.02901	4.93026e-07	0.0209172	0.550641	5.88801e-10
rs841204	ENSG00000089486	CDIP1	G	0.658269	-6.18008	-5.05979	4.19714e-07	0.0191053	0.51041	6.40204e-10
rs6842197	ENSG00000250312	ZNF718	A	15.2419	5.49297	-6.00646	1.89616e-09	0.000324943	1.86656e-52	3.95611e-08
rs6841951	ENSG00000250312	ZNF718	G	15.1293	5.4911	-5.93313	2.97209e-09	0.000440262	1.03636e-51	3.99664e-08
rs11727678	ENSG00000250312	ZNF718	A	15.2564	5.47752	-6.02766	1.66348e-09	0.000300437	1.49259e-52	4.31621e-08
rs7678326	ENSG00000250312	ZNF718	T	15.219	5.4717	-6.00716	1.88798e-09	0.000324943	2.64544e-52	4.45991e-08
rs7660115	ENSG00000250312	ZNF718	C	15.0266	5.46421	-5.88506	3.979e-09	0.00051724	4.91598e-51	4.64999e-08
rs891187	ENSG00000129990	SYT5	T	16.3704	5.46075	-6.76993	1.28842e-11	6.25584e-06	3.12186e-60	4.74528e-08
rs6815339	ENSG00000250312	ZNF718	G	14.9335	5.45938	-5.8288	5.58281e-09	0.000687221	1.99813e-50	4.78285e-08
rs7699689	ENSG00000250312	ZNF718	G	15.0413	5.45908	-5.89869	3.66391e-09	0.000500341	3.93147e-51	4.78824e-08
rs28637238	ENSG00000250312	ZNF718	G	15.2243	5.45431	-6.02564	1.68441e-09	0.000300437	2.44329e-52	4.91938e-08
rs10009670	ENSG00000250312	ZNF718	C	15.043	5.44835	-5.90782	3.46663e-09	0.000480915	3.83757e-51	5.08821e-08
rs9996597	ENSG00000250312	ZNF718	C	15.0549	5.44197	-5.92051	3.20943e-09	0.000459833	3.20099e-51	5.27449e-08
rs10030553	ENSG00000250312	ZNF718	C	15.0359	5.42932	-5.91737	3.27132e-09	0.000461141	4.26558e-51	5.66072e-08
rs11667847	ENSG00000129990	SYT5	G	16.1873	5.40562	-6.68978	2.23512e-11	1.02813e-05	6.20904e-59	6.45918e-08
rs6841571	ENSG00000250312	ZNF718	T	15.043	5.40145	-5.9429	2.80022e-09	0.000425245	3.83757e-51	6.61228e-08
rs10006358	ENSG00000250312	ZNF718	G	15.0637	5.39442	-5.96192	2.49299e-09	0.000389075	2.80207e-51	6.87529e-08
rs28605783	ENSG00000250312	ZNF718	T	15.0321	5.33494	-5.98541	2.15849e-09	0.000344428	4.5175e-51	9.56499e-08
rs10418024	ENSG00000129990	SYT5	C	16.4543	5.3253	-6.93651	4.019e-12	2.34169e-06	7.82489e-61	1.00842e-07
rs10422978	ENSG00000129990	SYT5	G	16.5617	5.32446	-7.00843	2.41011e-12	2.03186e-06	1.32036e-61	1.01287e-07
rs3786866	ENSG00000129990	SYT5	A	18.4309	5.24132	-8.31111	9.48095e-17	8.28617e-10	7.43751e-76	1.59536e-07
rs658642	ENSG00000269893	SNHG8	T	-12.9867	-5.23055	4.70606	2.52556e-06	0.0482996	1.4538e-38	1.68961e-07
rs28641663	ENSG00000250312	ZNF718	C	14.7779	5.11036	-5.98473	2.1675e-09	0.000344428	2.03108e-49	3.21818e-07
rs3729838	ENSG00000129990	SYT5	G	14.6564	4.98238	-5.99124	2.08252e-09	0.000343412	1.22965e-48	6.28654e-07
rs3729836	ENSG00000129990	SYT5	T	14.722	4.98161	-6.03534	1.58631e-09	0.00029498	4.67061e-49	6.30607e-07
rs11671293	ENSG00000129990	SYT5	C	14.6575	4.97706	-5.99595	2.02305e-09	0.000340021	1.20811e-48	6.45773e-07
rs28522661	ENSG00000250312	ZNF718	C	14.7017	4.91216	-6.08244	1.18364e-09	0.000235108	6.27688e-49	9.01521e-07
rs3810352	ENSG00000129990	SYT5	C	17.1626	4.90572	-7.71075	1.25079e-14	1.56166e-08	5.07715e-66	9.31422e-07
rs28377509	ENSG00000129990	SYT5	C	15.082	4.8228	-6.3993	1.56087e-10	5.61871e-05	2.12726e-51	1.41699e-06
rs61794994	ENSG00000250312	ZNF718	G	12.3235	4.62769	-4.70955	2.48268e-06	0.0476883	6.77754e-35	3.69928e-06
rs10002733	ENSG00000250312	ZNF718	C	12.2385	4.45764	-4.78771	1.68698e-06	0.0358731	1.93816e-34	8.28824e-06
rs3760869	ENSG00000129990	SYT5	G	17.1597	4.45476	-8.05584	7.8932e-16	2.03245e-09	5.32793e-66	8.40497e-06
rs7260371	ENSG00000129990	SYT5	A	15.4466	4.37987	-6.96626	3.25477e-12	2.03186e-06	7.97764e-54	1.18788e-05
rs2365725	ENSG00000129990	SYT5	C	15.45	4.37987	-6.96852	3.20294e-12	2.03186e-06	7.56779e-54	1.18788e-05
rs7260320	ENSG00000129990	SYT5	G	15.4552	4.37294	-6.97713	3.01279e-12	2.03186e-06	6.98116e-54	1.22663e-05
rs3848617	ENSG00000129990	SYT5	A	15.4439	4.37258	-6.96996	3.17035e-12	2.03186e-06	8.30591e-54	1.22888e-05
rs8106704	ENSG00000129990	SYT5	G	17.0153	4.35357	-8.03573	9.30203e-16	2.03245e-09	6.33565e-65	1.34042e-05
rs8106715	ENSG00000129990	SYT5	G	17.0081	4.33942	-8.04149	8.87494e-16	2.03245e-09	7.1642e-65	1.42872e-05
rs6599313	ENSG00000250312	ZNF718	C	12.6787	4.33233	-5.17357	2.29668e-07	0.0123544	7.77074e-37	1.47627e-05
rs7697467	ENSG00000250312	ZNF718	A	12.604	4.32873	-5.12667	2.94906e-07	0.0146444	2.01212e-36	1.5006e-05
rs2365727	ENSG00000129990	SYT5	G	16.7963	4.29913	-7.93106	2.1728e-15	3.16498e-09	2.60188e-63	1.7157e-05
rs6829346	ENSG00000250312	ZNF718	C	12.7083	4.28585	-5.22797	1.71378e-07	0.00972605	5.3246e-37	1.82083e-05
rs2365726	ENSG00000129990	SYT5	C	16.8716	4.28323	-7.99299	1.3171e-15	2.30224e-09	7.27975e-64	1.84224e-05
rs7665922	ENSG00000250312	ZNF718	C	12.7011	4.27766	-5.22932	1.70139e-07	0.00971885	5.83789e-37	1.88919e-05
rs6826124	ENSG00000250312	ZNF718	G	12.5897	4.27764	-5.15541	2.53076e-07	0.0131657	2.40891e-36	1.88919e-05
rs28851238	ENSG00000250312	ZNF718	T	12.7151	4.2706	-5.24388	1.57231e-07	0.00910048	4.8811e-37	1.95123e-05
rs7249414	ENSG00000129990	SYT5	A	15.8039	4.21217	-7.33754	2.17548e-13	2.37666e-07	2.92915e-56	2.5312e-05
rs10027536	ENSG00000250312	ZNF718	G	14.0566	4.20185	-6.18563	6.18547e-10	0.000150166	7.03763e-45	2.64801e-05
rs11728607	ENSG00000250312	ZNF718	T	12.6673	4.15253	-5.30051	1.15479e-07	0.00696042	8.98652e-37	3.29007e-05
rs3760871	ENSG00000129990	SYT5	A	14.9151	4.06115	-6.86061	6.85664e-12	3.74536e-06	2.63277e-50	4.8863e-05
rs3803905	ENSG00000129990	SYT5	C	14.355	3.83578	-6.6575	2.78528e-11	1.21714e-05	9.94119e-47	0.0001253
rs8111781	ENSG00000129990	SYT5	G	14.226	3.81445	-6.58782	4.46325e-11	1.85752e-05	6.33754e-46	0.0001365
rs11671466	ENSG00000129990	SYT5	A	12.172	3.79386	-5.24013	1.60466e-07	0.00922661	4.38212e-34	0.0001484
rs11666987	ENSG00000129990	SYT5	T	15.1078	3.66217	-7.28697	3.17012e-13	3.07847e-07	1.443e-51	0.0002503
rs11672000	ENSG00000129990	SYT5	G	13.2784	3.51357	-6.17668	6.54653e-10	0.000153735	3.08925e-40	0.0004424
rs10422172	ENSG00000129990	SYT5	T	11.1091	3.40435	-4.82607	1.39254e-06	0.0321121	1.13423e-28	0.0006636
rs373654	ENSG00000099308	MAST3	A	-10.9154	-3.40103	4.70133	2.58469e-06	0.0490938	9.73e-28	0.0006709
rs10425369	ENSG00000129990	SYT5	T	11.3519	3.40033	-4.99162	5.98758e-07	0.0239175	7.26515e-30	0.0006734
rs2288419	ENSG00000129990	SYT5	C	14.1077	3.36042	-6.84894	7.43982e-12	3.82486e-06	3.40986e-45	0.0007783
rs113334501	ENSG00000250312	ZNF718	C	11.6202	3.34962	-5.13551	2.81373e-07	0.0140537	3.26136e-31	0.0008093
rs61794992	ENSG00000250312	ZNF718	A	11.5232	3.34941	-5.1355	2.81401e-07	0.0140537	1.00797e-30	0.0008099
rs10414438	ENSG00000129990	SYT5	G	11.5951	3.33356	-5.20154	1.97639e-07	0.0108637	4.36866e-31	0.0008579
rs60818685	ENSG00000129990	SYT5	G	11.5101	3.2689	-5.1935	2.06376e-07	0.011273	1.17478e-30	0.00108
rs58646304	ENSG00000129990	SYT5	A	11.3465	3.26418	-5.08844	3.61014e-07	0.0169634	7.72794e-30	0.0010985
rs3848619	ENSG00000129990	SYT5	T	11.1415	3.20969	-4.99144	5.99318e-07	0.0239175	7.88697e-29	0.0013292
rs3729837	ENSG00000129990	SYT5	T	11.7396	3.1548	-5.42461	5.80808e-08	0.00453227	8.00524e-32	0.0016061
rs8107129	ENSG00000129990	SYT5	G	11.7448	3.07143	-5.49698	3.8635e-08	0.00324676	7.52778e-32	0.0021306
rs3935553	ENSG00000250312	ZNF718	G	11.5839	3.06585	-5.39441	6.87497e-08	0.0049004	4.9789e-31	0.0021709
rs3729841	ENSG00000129990	SYT5	T	11.9264	3.06556	-5.62007	1.90878e-08	0.00197539	8.64296e-33	0.0021738
rs6841277	ENSG00000250312	ZNF718	G	11.5665	3.06185	-5.38584	7.21054e-08	0.00508215	6.09883e-31	0.0022001
rs4541451	ENSG00000250312	ZNF718	T	11.5756	3.05916	-5.39384	6.89659e-08	0.0049004	5.49145e-31	0.0022208
rs11670538	ENSG00000129990	SYT5	T	11.8757	3.03441	-5.61155	2.00523e-08	0.00197649	1.58493e-32	0.0024101
rs8107736	ENSG00000129990	SYT5	C	11.7675	3.02976	-5.54321	2.96975e-08	0.00273211	5.74685e-32	0.0024488
rs61794968	ENSG00000250312	ZNF718	G	11.611	3.02784	-5.44081	5.30397e-08	0.00421415	3.62353e-31	0.0024634
rs13124826	ENSG00000250312	ZNF718	G	-10.9642	-2.98007	5.04729	4.48119e-07	0.019982	5.66752e-28	0.0028806
rs12649745	ENSG00000250312	ZNF718	T	-10.94	-2.97053	5.03837	4.69521e-07	0.0203145	7.40364e-28	0.0029722
rs7248028	ENSG00000129990	SYT5	C	10.9408	2.95202	-5.05276	4.35466e-07	0.0197196	7.3548e-28	0.0031572
rs7248997	ENSG00000129990	SYT5	G	10.3639	2.79245	-4.7892	1.67447e-06	0.0357813	3.62277e-25	0.0052319
rs77293870	ENSG00000129990	SYT5	C	11.7857	2.58826	-5.88553	3.96775e-09	0.00051724	4.6311e-32	0.0096479
rs9303230	ENSG00000179029	TMEM107	G	-4.30356	2.58737	4.79153	1.65512e-06	0.0356724	1.68045e-05	0.0096759
rs78021046	ENSG00000129990	SYT5	T	10.035	2.36975	-4.96804	6.76322e-07	0.0258268	1.06959e-23	0.0178073
rs11672834	ENSG00000129990	SYT5	T	11.505	2.36704	-5.85864	4.66663e-09	0.000591094	1.24489e-30	0.0179329
rs3803902	ENSG00000129990	SYT5	A	9.73701	2.32277	-4.71922	2.36746e-06	0.0458783	2.09652e-22	0.0202007
rs3803901	ENSG00000129990	SYT5	A	9.78687	2.31579	-4.76284	1.9089e-06	0.0388285	1.28292e-22	0.0205801
rs61735060	ENSG00000129990	SYT5	A	11.5949	2.1275	-6.10358	1.0372e-09	0.000215832	4.37887e-31	0.0333869
rs11671671	ENSG00000129990	SYT5	A	11.4986	2.06469	-6.08664	1.15304e-09	0.000234356	1.34383e-30	0.0389609
rs117989358	ENSG00000139351	SYCP3	G	-5.24334	1.71664	4.76389	1.89894e-06	0.0388285	1.57644e-07	0.0860523
rs12506245	ENSG00000269893	SNHG8	C	6.31864	-0.776067	-4.77141	1.82942e-06	0.0379781	2.63943e-10	0.437631
rs138423727	ENSG00000168806	LCMT2	C	7.07846	-0.144081	-4.80545	1.54401e-06	0.0345124	1.45828e-12	0.885343

## Sheet: Table S2
Table S2. Summary statistics for eQTLs in binding sites for estrogen receptor genes
SNP	Gene	Gene name	Allele	zscore_f	zscore_m	Z_diff	pval	FDR	pvalue_f	pvalue_m
rs11759768	ENSG00000091831	ESR1	G	2.71133	2.69137	0.213848	0.830666	0.998606	0.006704	0.0071195
rs851970	ENSG00000091831	ESR1	C	-2.07433	-0.563144	0.955393	0.339379	0.991531	0.0380422	0.573299
rs72850978	ENSG00000117984	CTSD	G	-3.96525	-3.87562	-0.267535	0.789057	0.998068	7.3273e-05	0.0001063
rs10743001	ENSG00000117984	CTSD	T	2.47474	2.02721	-0.125949	0.899772	0.999372	0.0133311	0.042642
rs72850967	ENSG00000117984	CTSD	G	-3.61215	-1.95956	0.931925	0.351375	0.991841	0.0003036	0.0500426
rs113473196	ENSG00000117984	CTSD	G	-3.91449	-1.91913	1.15978	0.246137	0.987971	9.05542e-05	0.054959
rs144932926	ENSG00000117984	CTSD	C	-3.99351	-1.9026	1.22456	0.22074	0.987613	6.50776e-05	0.0570928

## Sheet: Table S3
Table S3. Gene level summary statistics
ProbeIDF	Gene name	nr_of_samplesF	mean_expF	median_expF	sd_expF	max_expF	min_expF	ProbeIDM	nr_of_samplesM	mean_expM	median_expM	sd_expM	max_expM	min_expM	Pvalue	FDR
ENSG00000129990	SYT5	1926	-0.031	-0.776415	1.367	5.97738	-1.54956	ENSG00000129990	1516	-0.043	-0.526896	0.975	5.11335	-1.20458	1.84611e-42	8.74085e-39
ENSG00000186487	MYT1L	1926	0.006	-0.6457	1.48	5.99886	-2.02669	ENSG00000186487	1516	0.004	-0.407493	1.068	4.67692	-1.62171	8.60166e-40	3.25814e-36
ENSG00000253967	RP11-333A23.4	1926	-0.017	-1.07281	1.997	8.18344	-2.97154	ENSG00000253967	1516	-0.02	-0.0683987	2.502	8.96658	-4.30511	5.39469e-21	7.29786e-18
ENSG00000130508	PXDN	1926	0.019	0.105459	2.172	8.08302	-4.43753	ENSG00000130508	1516	0.024	0.0580003	1.939	6.60215	-4.2916	1.70691e-06	0.000147613
ENSG00000166387	PPFIBP2	1926	-0.026	0.0207906	0.572	1.96422	-2.23345	ENSG00000166387	1516	-0.026	-0.000623383	0.518	1.5027	-2.17925	2.43789e-05	0.00114285
ENSG00000139351	SYCP3	1926	0.079	0.184436	1.251	3.37987	-4.93145	ENSG00000139351	1516	0.033	0.136175	1.16	3.17531	-4.86823	0.000978388	0.0154286
ENSG00000250312	ZNF718	1926	0.07	0.1124	0.967	3.32274	-6.25401	ENSG00000250312	1516	0.067	0.152976	1.034	3.15775	-5.05105	0.00283404	0.0312328
ENSG00000103479	RBL2	1926	0.043	0.0471433	0.574	1.80368	-1.75052	ENSG00000103479	1516	0.072	0.0589837	0.538	2.20294	-2.3448	0.00394183	0.0384222
ENSG00000089486	CDIP1	1926	-0.086	-0.0792963	0.672	3.54164	-3.05157	ENSG00000089486	1516	-0.082	-0.0882191	0.698	2.52213	-3.2533	0.0585578	0.177302
ENSG00000179029	TMEM107	1926	-0.032	-0.0164217	0.377	1.02022	-1.55323	ENSG00000179029	1516	-0.042	-0.0329238	0.365	1.15077	-1.43276	0.0920812	0.224692
ENSG00000162408	NOL9	1926	-0.036	-0.0218037	0.437	1.33886	-1.87616	ENSG00000162408	1516	-0.049	-0.0243154	0.424	1.1836	-1.97335	0.107516	0.242391
ENSG00000095261	PSMD5	1926	0.009	0.0257506	0.297	0.923626	-1.7256	ENSG00000095261	1516	0.01	0.0107218	0.289	0.913689	-1.58954	0.131148	0.267392
ENSG00000168806	LCMT2	1926	-0.005	0.0209218	0.371	1.09236	-1.76504	ENSG00000168806	1516	0.003	0.0389089	0.363	0.979535	-1.37558	0.185458	0.317805
ENSG00000138363	ATIC	1926	-0.075	-0.0628722	0.643	2.05762	-5.31108	ENSG00000138363	1516	-0.064	-0.087166	0.655	1.88393	-2.48232	0.22251	0.345898
ENSG00000140090	SLC24A4	1926	-0.003	0.0277943	0.751	3.56683	-3.13635	ENSG00000140090	1516	0.003	0.0468652	0.739	2.49301	-3.51755	0.254368	0.369014
ENSG00000164414	SLC35A1	1926	0.061	0.0925364	0.72	2.27727	-3.34428	ENSG00000164414	1516	0.06	0.0963962	0.725	2.11125	-3.99118	0.387083	0.444328
ENSG00000099308	MAST3	1926	-0.028	-0.00748633	0.528	1.5294	-2.11021	ENSG00000099308	1516	0.004	0.0201385	0.531	1.66469	-2.22429	0.407008	0.454019
ENSG00000269893	SNHG8	1926	0.007	0.0122135	0.825	3.37749	-2.77441	ENSG00000269893	1516	0.006	-0.021888	0.822	3.33418	-2.90095	0.441158	0.468913

## Sheet: Table S4
Table S4. Wilcoxon test P-values for mean sex differences in cellular composition
celltype	Wilcoxon.Pvalue
Granulocytes	9.12473e-07
B cells (CD19+)	1.39072e-13
CD4+ T cells	9.78264e-87
CD8+ T cells	5.29087e-10
DN (CD4- CD8-)	0.862411
NK dim (CD56+ CD16+)	2.147e-28
Monocytes (CD14+)	1.71189e-90
Lymphocytes	3.25379e-21
CD45RO- CD45RA+ T cells	1.04947e-52
CD4+ Naive CD45RA+ CD27+	6.12809e-69
CD4+ Naive CD45RO- CD27+	2.46293e-65
Intermediate monocytes (CD14+CD16+)	7.77946e-46
CD8+ Naive CD45RA+ CD27+	3.5532e-51
CD8+ EM CD45RA- CD27-	1.73442e-18
CD8+ Naive CD45RO- CD27+	4.92558e-45
IgD+ IgM+	8.67995e-05
IgD+ IgM-	0.0022319
IgD- IgM-	5.17413e-35
NaiveB cells (IgD+ IgM+ CD27-)	2.62954e-05
Memory B cells (IgD+ IgM+ CD27+)	1.93713e-07
CD24+ CD38+	2.48728e-06
T cells (CD3+ CD56-)	5.16842e-40
Transitional B cells (CD24++ CD38++)	0.000837524
Naive mature B cells (CD24+ CD38+ CD27- IgM+)	9.35124e-06
CD24+ CD38+ CD27+ IgM+	1.25283e-10
IgM-	1.48343e-22
Natural effector (CD24+ CD38+ IgD+ IgM+)	2.2104e-10
NK cells (CD3- CD56+)	6.6082e-26
IgD- CD5+	6.52423e-32
IgD+ CD5+	0.000131815
Prol CD4+ Tconv	5.78251e-22
Prol CD4+ Treg	7.28613e-22
Treg HLA-DR+	3.15243e-20

## Sheet: Table S5
Table S5. Wilcoxon test P-values for mean sex differences in principal components
PC	Wilcoxon.Pvalue
Comp1	0.999673
Comp2	3.03314e-118
Comp3	0
Comp4	1.11465e-24
Comp5	3.84e-165
Comp6	8.21396e-44
Comp8	0.323317
Comp10	0.587637
Comp11	0.0647802
Comp13	0.0124306
Comp14	0.588118
Comp16	0.0473782
Comp17	0.00974335
Comp20	0.790829
Comp21	0.736801
Comp22	0.822611
Comp24	0.111891

## Sheet: Table S6
Table S6. Levene test P-values for mean sex differences before and after correcting for principal components
gene	Levene.Pvalue
ATIC after PC	0.0354789
ATIC before PC	0.123899
CDIP1 after PC	0.151001
CDIP1 before PC	0.0113235
LCMT2 after PC	0.47792
LCMT2 before PC	0.96531
MAST3 after PC	0.924417
MAST3 before PC	0.0289521
MYT1L after PC	1.82189e-29
MYT1L before PC	1.50372e-25
NOL9 after PC	0.329892
NOL9 before PC	0.108429
PPFIBP2 after PC	7.88544e-05
PPFIBP2 before PC	4.48371e-06
PSMD5 after PC	0.221538
PSMD5 before PC	0.490833
PXDN after PC	1.02332e-08
PXDN before PC	1.54882e-08
RBL2 after PC	0.0317497
RBL2 before PC	0.680637
RP11-333A23.4 after PC	1.72775e-25
RP11-333A23.4 before PC	5.83594e-26
SLC24A4 after PC	0.602717
SLC24A4 before PC	0.362749
SLC35A1 after PC	0.660246
SLC35A1 before PC	1.84946e-05
SNHG8 after PC	0.819248
SNHG8 before PC	0.0015014
SYCP3 after PC	0.0158082
SYCP3 before PC	0.00206588
SYT5 after PC	3.83752e-30
SYT5 before PC	6.80956e-30
TMEM107 after PC	0.526196
TMEM107 before PC	0.00938688
ZNF718 after PC	0.0484803
ZNF718 before PC	0.344544

## Sheet: Table S7
Table S7. BIOS results for the sex-biased eQTLs found in Yao et al [PMID: 24242183]
		Yao et al results							BIOS results
SNP	Expressed gene	P-value (interaction)	P-value (main effect)	β (men)	P-value (men)	β (women)	P-value (women)	P-value (differential expression)	SNP	Effect Allele	Beta men	P men	Beta women	P women	P_diff	R2 with the SNP reported in Yao et al
rs9302752	NOD2	8.15E-10	2.41E-35	0.23	4.21E-233	0.29	<1E-300	NS	rs9302752	T	0.705	3.27E-310	0.726	3.27E-310	0.071
rs9270986	HLA-DRB5	4.33E-09	1.29E-218	2.49	<1E-300	2.35	<1E-300	NS	rs9271055	T	0.682	2.98e-191	0.69	1.61e-258	0.62	PROXY r2=0.99
rs3129860	HLA-DRB5	2.57E-05	1.99E-121	2.45	<1.0E-300	2.33	<1.0E-300	NS	rs9271055	T	0.682	2.98e-191	0.69	1.61e-258	0.62	PROXY r2=0.87
rs1335515	KIAA0586	4.00E-06	NS	0.01	0.03	−0.016	0.00014	1.69E-10	No proxy
rs12145451	PPP2R5A	3.35E-06	1.27E-15	0.14	8.21E-74	0.19	2.30E-152	NS	rs12145451	A	0.557	1.43e-150	0.553	4.1e-186	0.809
rs8047080	TSNAXIP1	6.08E-06	NS	0.03	7.03E-05	−0.011	NS	NS	rs8047080	G	0.08	0.002	0.046	0.043	0.327
rs599634	MUT	8.35E-06	NS	0.04	9.13E-06	−0.01	0.16	NS	rs599634	T	0.04	0.122	0.024	0.287	0.652
rs846793	GRIK2	8.6E-06	NS	−0.03	0.001	−0.024	0.002	NS	gene not found
rs11634397	C15orf37	9.60E-06	NS	−0.026	0.002	0.018	0.015	0.013	No proxy
rs17291650	LIMA1	1.66E-05	NS	0.023	0.026	−0.031	0.00081	2.02E-13	rs17291650	G	-0.098	0.000125	-0.125	3.57e-08	0.431
rs6867983	IL6ST	2.67E-05	NS	−0.023	0.05	0.038	0.0006	1.07E-49	No proxy
rs3132610	HCG8	3.71E-05	NS	−0.036	NS	0.06	0.00011	0.01	gene not found
rs644148	BLOC1S3	3.93E-05	NS	0.013	0.016	−0.015	0.0014	NS	No proxy
rs10503734	NKX3-1	5.07E-05	NS	0.023	0.0034	0.066	2.42E-18	1.91E-06	rs10503734	C	0.175	4.38e-12	0.168	7.38e-14	0.83

## Sheet: Table S8
Table S8. BIOS results for the sex-biased eQTLs found in Kukurba et al [PMID: 27197214]
			Genotype-sex interaction term			eQTL discovery in populations
						male		female		joint		BIOS results
CHR	SNP	GENE	beta	Pvalue	FDR	beta	Pvalue	beta	Pvalue	beta	Pvalue	SNP	Effect Allele	Beta men	P men	Beta women	P women	P_diff	R2 with the SNP reported in Yao et al
5	rs66668391	WDR36	-0.17	7.6e-11	0.00018	0.21	4.9e-15	0.07	4.8e-13	0.08	4.8e-13	no proxy
16	rs4785448	NOD2	-0.15	5.1e-10	0.0012	-0.62	<1E-16	-0.48	<1E-16	-0.59	<1E-16	rs4785448	G	0.689	3.11e-300	0.708	3.27E-310	0.138553
11	Chr 11: 62735958:D	BSCL2	-0.24	5.5e-10	0.0017	0.41	<1E-16	0.28	1.9e-14	0.24	<1E-16	rs67381592	T	0.018	0.48	0.051	0.024	0.329	R2=0.995
3	rs9846315	DNAH1	-0.08	1.1e-08	0.02	0.06	1.2e-06	0	0.82	0	0.65	no proxy

## Sheet: Table S9
Table S9. Replication analyses results - SHIP-Trend cohort					BIOS							SHIP-TREND
Marker	Gene	Gene Name	Allele 1	Allele 2	Beta Females	SE Females	P Females	Beta Males	SE Males	P Males	P difference	Beta Females	SE Females	P Females	Beta Males	SE Males	P Males	P combined (F+M)	P difference	Proxy in SHIP-TREND
rs7126061	ENSG00000166387	PPFIBP2	G	A	-0.626606	0.0227862	9.697e-273	-0.526129	0.0256833	3.25981e-128	6.73078e-08	-0.203163	0.011792	1.77083e-52	-0.190131	0.0130139	1.33091e-38	7.26e-113	0.458056	rs4758197 (R2=0.95)
rs2024449	ENSG00000103479	RBL2	C	T	-0.550363	0.0227862	5.18672e-184	-0.433009	0.0256833	4.57548e-78	1.91402e-07	-0.0823252	0.00801776	1.47853e-22	-0.0650533	0.0087826	8.57547e-13	2.82e-36	0.146389
rs12467139	ENSG00000186487	MYT1L	G	A	0.46461	0.0227862	2.55953e-117	0.28694	0.0256833	1.97905e-31	5.47744e-11	0.0262151	0.00772575	0.00074606	-0.00374958	0.00836866	0.654375	0.029	0.00851601	rs11695002 (R2=0.91)
rs72631612	ENSG00000140090	SLC24A4	T	C	-0.0495173	0.0227862	0.0295702	-0.232379	0.0256833	1.37052e-20	3.49495e-08	-0.018022	0.0176424	0.307508	-0.0850958	0.0196085	1.83568e-05	0.00025	0.0109941
rs12684934	ENSG00000095261	PSMD5	C	T	0.313619	0.0227921	1.38117e-47	0.164477	0.0256833	8.44796e-11	1.91248e-06	0.0367341	0.0117754	0.00191656	0.00068828	0.0137568	0.960123	0.016	0.0465278
rs9303230	ENSG00000179029	TMEM107	G	A	-0.0975935	0.0227862	1.68045e-05	0.0663059	0.0256833	0.0096759	1.65512e-06	-0.0276259	0.0576061	0.631748	-0.189719	0.0631844	0.00285557	0.02	0.0579917

## Sheet: Table S10
Table S10. PheWAS for top sex-specific eQTLs
BIOS results						phewas UKBB						sex specific GWAS
													females				males
Gene	Variant	Position	Beta_eQTLs_F	Beta_eQTLs_M	Eff. Allele	Trait	Beta	p-value	MAF	HWE	imp. score	effect_allele	beta	se	P		beta	se	P	Pdiff	FDR
CDIP1	rs7206782	4515145	-0.0433799	-0.236445	C	Waist circumference / Hip circumference	-0.00083771	7.875e-10	0.262845	0.3083	0.995308	A	-0.00111401	0.000244143	5.0447e-06	rs7206782	-0.000610974	0.000243719	0.0121801	0.144788	0.885417
	rs7206782	4515145	-0.0433799	-0.236445	C	Platelet count	-0.58822	9.6913e-09	0.262845	0.3083	0.995308	A	-0.00693824	0.00370974	0.0614472	16:4515145:A:C	-0.0168569	0.00396963	2.17292e-05	0.067918	0.954283
	rs7206782	4515145	-0.0433799	-0.236445	C	Eosinophill count	-0.0014112	2.8895e-08	0.262845	0.3083	0.995308	A	-0.00490838	0.00273898	0.073127	16:4515145:A:C	-0.0112774	0.00293239	0.00012021	0.112454	0.973101
PSMD5	rs12684934	123593159	0.313619	0.164477	T	Standing height	-0.077543	2.553e-20	0.41855	0.3868	0.999186	C	-0.0156146	0.00316486	8.07385e-07	9:123593159:C:T	-0.0169405	0.00343254	8.01186e-07	0.776422	0.996022
	rs12684934	123593159	0.313619	0.164477	T	Lymphocyte count	0.0099285	3.0571e-19	0.41855	0.3868	0.999186	C	0.0207665	0.00330166	3.18714e-10	9:123593159:C:T	0.0199068	0.0035587	2.22439e-08	0.859432	1
	rs12684934	123593159	0.313619	0.164477	T	Platelet count	0.78196	2.6271e-17	0.41855	0.3868	0.999186	C	0.0148133	0.0032997	7.15081e-06	9:123593159:C:T	0.0234953	0.00353906	3.1714e-11	0.0727676	0.955371
	rs12684934	123593159	0.313619	0.164477	T	Lymphocyte percentage	0.086641	4.1026e-11	0.41855	0.3868	0.999186	C	0.0182336	0.00328224	2.77628e-08	9:123593159:C:T	0.0131628	0.00353529	0.000196739	0.293189	0.987708
	rs12684934	123593159	0.313619	0.164477	T	High light scatter reticulocyte percentage	0.002322	9.8566e-11	0.41855	0.3868	0.999186	C	0.0151587	0.00333032	5.32451e-06	9:123593159:C:T	0.0152806	0.00358428	2.01609e-05	0.980123	0.999837
	rs12684934	123593159	0.313619	0.164477	T	Mean platelet (thrombocyte) volume	-0.010187	1.1797e-10	0.41855	0.3868	0.999186	C	-0.00963552	0.00330263	0.00352859	9:123593159:C:T	-0.0176078	0.00356044	7.60688e-07	0.100669	0.995806
	rs12684934	123593159	0.313619	0.164477	T	Eosinophill percentage	-0.01977	3.3692e-10	0.41855	0.3868	0.999186	C	-0.0101155	0.0033068	0.00222097	9:123593159:C:T	-0.0150109	0.0035629	2.52025e-05	0.313896	0.987541
	rs12684934	123593159	0.313619	0.164477	T	Platelet crit	0.00047599	5.9423e-10	0.41855	0.3868	0.999186	C	0.0115752	0.00329345	0.000440481	9:123593159:C:T	0.0167499	0.00353299	2.12841e-06	0.284004	0.980744
	rs12684934	123593159	0.313619	0.164477	T	High light scatter reticulocyte count	9.785e-05	1.0838e-09	0.41855	0.3868	0.999186	C	0.0143857	0.00332937	1.5551e-05	9:123593159:C:T	0.0138093	0.00358672	0.000118106	0.906241	0.998273
	rs12684934	123593159	0.313619	0.164477	T	Reticulocyte percentage	0.005401	2.9094e-08	0.41855	0.3868	0.999186	C	0.0123459	0.00333242	0.000211639	9:123593159:C:T	0.0158152	0.00358682	1.03789e-05	0.478569	0.987094
MAST3	rs373654	18187899	-0.241426	-0.0870183	A	Trunk fat mass	0.061413	4.5717e-11	0.31176	0.8986	0.997821	A	0.0103021	0.00348505	0.00311598	19:18187899:G:A	0.0185032	0.00373966	7.51196e-07	0.108639	0.931151
	rs373654	18187899	-0.241426	-0.0870183	A	Body fat percentage	0.075823	4.8683e-11	0.31176	0.8986	0.997821	A	0.00922707	0.00344668	0.0074271	19:18187899:G:A	0.0208487	0.00369305	1.65e-08	0.021414	0.831796
	rs373654	18187899	-0.241426	-0.0870183	A	Trunk fat percentage	0.087185	5.4286e-11	0.31176	0.8986	0.997821	A	0.0094297	0.00345934	0.00641381	19:18187899:G:A	0.0206003	0.00369636	2.50595e-08	0.02735	0.809698
	rs373654	18187899	-0.241426	-0.0870183	A	Leg fat percentage (left)	0.059572	4.7293e-10	0.31176	0.8986	0.997821	A	0.00800912	0.00340476	0.0186571	19:18187899:G:A	0.0206604	0.00369313	2.21878e-08	0.0117817	0.801324
	rs373654	18187899	-0.241426	-0.0870183	A	Whole body fat mass	0.10458	4.8474e-10	0.31176	0.8986	0.997821	A	0.0101373	0.00348255	0.00360435	19:18187899:G:A	0.0181838	0.00375598	1.29125e-06	0.116195	0.944059
	rs373654	18187899	-0.241426	-0.0870183	A	Leg fat percentage (right)	0.061678	8.8549e-10	0.31176	0.8986	0.997821	A	0.00745778	0.00340617	0.0285625	19:18187899:G:A	0.0203086	0.00369041	3.73798e-08	0.0105012	0.81602
	rs373654	18187899	-0.241426	-0.0870183	A	Waist circumference / Hip circumference	0.00075105	5.8633e-09	0.31176	0.8986	0.997821	A	0.000687485	0.000231429	0.00297209	19:18187899:G:A	0.00104898	0.000231238	5.72284e-06	0.269171	0.927771
	rs373654	18187899	-0.241426	-0.0870183	A	Waist circumference	0.12997	6.2487e-09	0.31176	0.8986	0.997821	A	0.0107958	0.00344067	0.00170302	19:18187899:G:A	0.0140411	0.00371307	0.000155925	0.521461	0.983777
	rs373654	18187899	-0.241426	-0.0870183	A	Leg fat mass (right)	0.016307	1.565e-08	0.31176	0.8986	0.997821	A	0.00937267	0.00347853	0.00705142	19:18187899:G:A	0.0181779	0.00375699	1.30991e-06	0.0854784	0.919451
	rs373654	18187899	-0.241426	-0.0870183	A	Leg fat mass (left)	0.015829	1.9763e-08	0.31176	0.8986	0.997821	A	0.0099112	0.00347645	0.00435927	19:18187899:G:A	0.0185812	0.00375946	7.71944e-07	0.0904168	0.923718
RBL2	rs2024449	53494617	-0.550363	-0.433009	C	Standing height	0.089567	1.4894e-27	0.44324	0.06925	0.999211	C	0.0197904	0.00313782	2.85041e-10	16:53494617:T:C	0.0219298	0.00340122	1.13927e-10	0.643853	0.993434
	rs2024449	53494617	-0.550363	-0.433009	C	Sitting height	0.053801	7.4104e-22	0.44324	0.06925	0.999211	C	0.0155324	0.00309954	5.41371e-07	16:53494617:T:C	0.021432	0.00338299	2.37599e-10	0.198508	0.978801
	rs2024449	53494617	-0.550363	-0.433009	C	Whole body fat-free mass	0.077924	5.7895e-15	0.44324	0.06925	0.999211	C	0.0171449	0.00319232	7.85306e-08	16:53494617:T:C	0.016144	0.00342358	2.41268e-06	0.830686	0.996051
	rs2024449	53494617	-0.550363	-0.433009	C	Whole body water mass	0.057228	7.1923e-15	0.44324	0.06925	0.999211	C	0.017316	0.00319411	5.92645e-08	16:53494617:T:C	0.0163125	0.00342521	1.91381e-06	0.830339	0.995881
	rs2024449	53494617	-0.550363	-0.433009	C	Leg fat-free mass (right)	0.015442	7.6743e-15	0.44324	0.06925	0.999211	C	0.0184833	0.00317635	5.9277e-09	16:53494617:T:C	0.0157487	0.00335597	2.69778e-06	0.553982	0.989494
	rs2024449	53494617	-0.550363	-0.433009	C	Leg predicted mass (right)	0.014358	1.287e-14	0.44324	0.06925	0.999211	C	0.0181585	0.00317628	1.08647e-08	16:53494617:T:C	0.0156145	0.00335575	3.2729e-06	0.581922	0.990636
	rs2024449	53494617	-0.550363	-0.433009	C	Trunk predicted mass	0.037127	3.5249e-14	0.44324	0.06925	0.999211	C	0.0164613	0.00319072	2.48364e-07	16:53494617:T:C	0.01652	0.00346352	1.84654e-06	0.990055	1
	rs2024449	53494617	-0.550363	-0.433009	C	Trunk fat-free mass	0.03859	4.0589e-14	0.44324	0.06925	0.999211	C	0.0165509	0.00319048	2.13255e-07	16:53494617:T:C	0.0164967	0.0034632	1.90509e-06	0.990816	1
	rs2024449	53494617	-0.550363	-0.433009	C	Leg predicted mass (left)	0.013518	5.2699e-13	0.44324	0.06925	0.999211	C	0.0168532	0.00318891	1.25895e-07	16:53494617:T:C	0.0149165	0.00337919	1.01432e-05	0.676805	0.992951
	rs2024449	53494617	-0.550363	-0.433009	C	Basal metabolic rate	9.7429	7.0537e-13	0.44324	0.06925	0.999211	C	0.0158025	0.0031969	7.69702e-07	16:53494617:T:C	0.0149844	0.00342442	1.21088e-05	0.86137	0.99733
	rs2024449	53494617	-0.550363	-0.433009	C	Leg fat-free mass (left)	0.014271	8.9111e-13	0.44324	0.06925	0.999211	C	0.016691	0.00318889	1.65965e-07	16:53494617:T:C	0.014972	0.00337921	9.40237e-06	0.711403	0.993817
	rs2024449	53494617	-0.550363	-0.433009	C	Comparative height size at age 10	0.0073137	1.2876e-10	0.44324	0.06925	0.999211	C	0.0105886	0.0022194	1.83508e-06	16:53494617:T:C	0.00841456	0.0023403	0.000323864	0.500278	0.995378
	rs2024449	53494617	-0.550363	-0.433009	C	Arm fat-free mass (right)	0.0045866	2.3508e-10	0.44324	0.06925	0.999211	C	0.0136215	0.00323474	2.5436e-05	16:53494617:T:C	0.0125814	0.00339167	0.000207741	0.824379	0.997092
	rs2024449	53494617	-0.550363	-0.433009	C	Arm predicted mass (right)	0.0042796	3.5625e-10	0.44324	0.06925	0.999211	C	0.0134312	0.00323494	3.29847e-05	16:53494617:T:C	0.0127075	0.00339197	0.000179495	0.877296	0.998334
	rs2024449	53494617	-0.550363	-0.433009	C	Hip circumference	0.096948	1.1935e-09	0.44324	0.06925	0.999211	C	0.0130139	0.00322474	5.44741e-05	16:53494617:T:C	0.0106239	0.0034806	0.00227115	0.614469	0.989817
	rs2024449	53494617	-0.550363	-0.433009	C	Arm fat-free mass (left)	0.0046733	1.3602e-09	0.44324	0.06925	0.999211	C	0.0142876	0.00324072	1.04009e-05	16:53494617:T:C	0.0118714	0.0034259	0.00053002	0.6084	0.987908
	rs2024449	53494617	-0.550363	-0.433009	C	Arm predicted mass (left)	0.0043664	1.9017e-09	0.44324	0.06925	0.999211	C	0.0147696	0.00324077	5.18164e-06	16:53494617:T:C	0.0115948	0.00342598	0.000713583	0.500815	0.98192
	rs2024449	53494617	-0.550363	-0.433009	C	Weight	0.13699	5.9771e-09	0.44324	0.06925	0.999211	C	0.0114101	0.00322855	0.000409213	16:53494617:T:C	0.00954299	0.00347499	0.00602981	0.693855	0.994076
	rs2024449	53494617	-0.550363	-0.433009	C	Weight	0.13092	2.1402e-08	0.44324	0.06925	0.999211	C	0.0117299	0.00325038	0.000307739	16:53494617:T:C	0.00914892	0.00350284	0.00900603	0.589118	0.991413
	rs2024449	53494617	-0.550363	-0.433009	C	Impedance of leg (right)	-0.29629	3.7101e-08	0.44324	0.06925	0.999211	C	-0.014267	0.00324619	1.10831e-05	16:53494617:T:C	-0.0097144	0.00350001	0.0055117	0.34024	0.974588
SLC24A4	rs72631612	92909979	-0.0495173	-0.232379	T	Platelet distribution width	0.0072592	7.9607e-09	0.131166	0.8459	0.992456	T	0.0223287	0.00482881	3.76556e-06	14:92909979:C:T	0.0177423	0.00518287	0.000618921	0.517339	0.999312
NOL9	rs6692747	6610049	-0.359751	-0.209745	T	Standing height	-0.084392	1.3912e-10	0.116846	0.2426	0.998979	T	-0.0160346	0.00486567	0.000982785	1:6610049:C:T	-0.0216963	0.00528063	3.98158e-05	0.430415	0.987178
	rs6692747	6610049	-0.359751	-0.209745	T	Platelet crit	0.00071602	1.3914e-09	0.116846	0.2426	0.998979	T	0.0149964	0.00506361	0.00306075	1:6610049:C:T	0.0168612	0.00543493	0.00192003	0.801781	0.997393
	rs6692747	6610049	-0.359751	-0.209745	T	Mean corpuscular haemoglobin concentration	-0.016371	4.9671e-09	0.116846	0.2426	0.998979	T	-0.0190694	0.00507916	0.000173779	1:6610049:C:T	-0.017799	0.0054585	0.00111126	0.864708	0.999864
SLC35A1	rs9450738	88267314	-0.141159	-0.301259	G	Neutrophill percentage	-0.15544	1.527e-24	0.463771	0.1786	0.999484	A	-0.0209312	0.00325056	1.20361e-10	6:88267314:A:G	-0.0227999	0.00350879	8.16606e-11	0.696026	0.997594
	rs9450738	88267314	-0.141159	-0.301259	G	Monocyte percentage	0.032417	7.1514e-18	0.463771	0.1786	0.999484	A	0.0163067	0.0032671	6.00615e-07	6:88267314:A:G	0.0217122	0.0035135	6.43927e-10	0.259883	1
	rs9450738	88267314	-0.141159	-0.301259	G	Neutrophill count	-0.021217	3.1728e-17	0.463771	0.1786	0.999484	A	-0.0176181	0.00325711	6.3416e-08	6:88267314:A:G	-0.0173262	0.00350051	7.44353e-07	0.951321	0.999927
	rs9450738	88267314	-0.141159	-0.301259	G	Eosinophill percentage	0.025265	5.4591e-16	0.463771	0.1786	0.999484	A	0.0135625	0.00327488	3.45401e-05	6:88267314:A:G	0.0183064	0.00352232	2.02508e-07	0.323959	0.987659
	rs9450738	88267314	-0.141159	-0.301259	G	Lymphocyte percentage	0.092068	1.6039e-12	0.463771	0.1786	0.999484	A	0.0156651	0.0032507	1.44395e-06	6:88267314:A:G	0.015336	0.00349507	1.14521e-05	0.94503	0.999757
	rs9450738	88267314	-0.141159	-0.301259	G	Impedance of leg (right)	0.37821	2.0569e-12	0.463771	0.1786	0.999484	A	0.0133891	0.0032443	3.6775e-05	6:88267314:A:G	0.0180855	0.00349264	2.24332e-07	0.324528	0.973236
	rs9450738	88267314	-0.141159	-0.301259	G	Impedance of leg (left)	0.36894	7.0986e-12	0.463771	0.1786	0.999484	A	0.0123649	0.00324465	0.000138525	6:88267314:A:G	0.0189762	0.00349164	5.49455e-08	0.165429	0.959749
	rs9450738	88267314	-0.141159	-0.301259	G	White blood cell (leukocyte) count	-0.017398	2.4131e-08	0.463771	0.1786	0.999484	A	-0.0109876	0.00326348	0.000760538	6:88267314:A:G	-0.00987963	0.00350229	0.00478939	0.816966	0.997751
	rs9450738	88267314	-0.141159	-0.301259	G	Eosinophill count	0.0012473	2.8534e-08	0.463771	0.1786	0.999484	A	0.00638742	0.00241277	0.00811363	6:88267314:A:G	0.0085577	0.00258476	0.000930399	0.539355	0.997213

[truncated: 5 more sheets: Table S11, Table S12, Table S13, Table S14, Table S15]
